# Supplementary material
Source: publisher figshare collection journal article supplement (https://tandf.figshare.com/articles/dataset/_/12851855)
Supplement: Supplementary file 1 [file 2]

## Sheet: RNAseq up
	shCtrl_E2_rep1	shCtrl_E2_rep2	shCtrl_Veh_rep1	shCtrl_Veh_rep2	baseMean	log2FoldChange	lfcSE	stat	pvalue	padj	transcript_type	transcript_name
ENSG00000006062.9	7.68482	7.68628	7.40518	7.30624	187.568	0.655491	0.166497	3.93694	8.25262e-05	0.000324857	processed_transcript	MAP3K14
ENSG00000012171.13	8.64384	8.71104	7.95489	7.88752	344.911	1.41595	0.129993	10.8925	1.25216e-27	2.19411e-26	processed_transcript	SEMA3B
ENSG00000034063.9	8.54375	8.64801	8.13182	8.18375	343.28	0.815574	0.128389	6.35239	2.11995e-10	1.51647e-09	processed_transcript	UHRF1
ENSG00000130600.11	5.18924	5.26494	4.52853	4.41436	34.9029	2.64342	0.35254	7.49821	6.4693e-14	6.03058e-13	processed_transcript	H19
ENSG00000170846.11	10.4487	10.4605	10.1784	10.1627	1287	0.490717	0.0660589	7.42848	1.0985e-13	1.00862e-12	lincRNA	AC093323.3
ENSG00000175701.6	8.93747	8.89832	8.47774	8.48118	428.453	0.793213	0.112832	7.03002	2.06504e-12	1.72697e-11	lincRNA	LINC00116
ENSG00000177822.3	7.12042	7.12889	6.7972	6.88727	128.733	0.58968	0.195531	3.01578	0.00256316	0.00787788	antisense	AC108142.1
ENSG00000179219.5	3.73149	3.65311	3.42381	3.32842	12.7533	1.48261	0.395561	3.74812	0.000178164	0.000666688	lincRNA	LINC00311
ENSG00000189149.7	6.61828	6.55003	6.1692	6.21733	86.9776	0.896888	0.231736	3.87031	0.000108699	0.000419772	lincRNA	CRYM-AS1
ENSG00000196668.3	6.24097	6.21817	5.54719	5.66642	66.6448	1.56521	0.26713	5.85936	4.64652e-09	2.96744e-08	processed_transcript	LINC00173
ENSG00000196756.7	9.02319	9.04437	8.66383	8.78152	478.242	0.552162	0.110811	4.98293	6.2627e-07	3.23767e-06	processed_transcript	SNHG17
ENSG00000206113.3	6.41711	6.56721	5.57353	5.4345	79.107	2.53481	0.271712	9.32905	1.06825e-20	1.41403e-19	lincRNA	RP11-503N18.1
ENSG00000214049.6	4.72255	4.8759	4.51343	4.38305	26.2038	1.22704	0.353983	3.46638	0.000527518	0.00183715	processed_transcript	UCA1
ENSG00000215417.6	6.48917	6.55297	6.15319	6.25245	84.3264	0.735876	0.234523	3.13775	0.00170247	0.00542443	processed_transcript	MIR17HG
ENSG00000223414.2	6.51471	6.53495	6.02748	6.04574	82.1957	1.15537	0.237581	4.86307	1.15576e-06	5.80085e-06	lincRNA	LINC00473
ENSG00000223749.3	6.57039	6.56777	6.08041	6.06281	84.6319	1.16966	0.234959	4.97816	6.4193e-07	3.3141e-06	lincRNA	MIR503HG
ENSG00000225465.6	5.56943	5.802	4.59318	4.60719	48.1323	3.69113	0.357044	10.338	4.74167e-25	7.51604e-24	antisense	RFPL1S
ENSG00000227036.2	4.1723	4.22114	3.81191	3.82728	17.5088	1.60909	0.381665	4.21598	2.48693e-05	0.000105646	lincRNA	LINC00511
ENSG00000227218.3	7.35699	7.29992	6.36286	6.28977	136.432	2.18742	0.208625	10.485	1.01287e-25	1.64967e-24	antisense	RP11-203J24.8
ENSG00000229645.4	6.14535	5.9601	5.66225	5.66555	60.9759	0.986216	0.271546	3.63185	0.000281398	0.00102465	lincRNA	LINC00341
ENSG00000229953.1	5.45849	5.3903	5.03367	5.05702	39.6947	1.12151	0.30948	3.62385	0.000290245	0.00105423	antisense	RP11-284F21.7
ENSG00000230314.2	4.62982	4.66246	4.32989	4.33068	23.5889	1.15519	0.35565	3.24811	0.00116174	0.00382308	antisense	ELOVL2-AS1
ENSG00000230978.1	2.69217	2.71792	2.53209	2.48394	6.51001	1.13185	0.384591	2.943	0.00325051	0.00982466	lincRNA	LINC00160
ENSG00000232124.1	7.39878	7.40669	7.06334	7.08807	154.29	0.668104	0.179274	3.72671	0.000193993	0.000722213	antisense	AP001057.1
ENSG00000232445.1	8.5659	8.5266	7.68881	7.61853	311.145	1.68958	0.138319	12.2151	2.58053e-34	5.80528e-33	antisense	RP11-132A1.4
ENSG00000232677.2	9.4492	9.52411	9.13648	9.10534	645.386	0.654243	0.0944596	6.92617	4.32397e-12	3.5319e-11	lincRNA	LINC00665
ENSG00000232956.4	7.29074	7.30387	6.94628	6.8972	142.065	0.783492	0.186836	4.19348	2.74704e-05	0.000115967	lincRNA	SNHG15
ENSG00000233184.2	6.71992	6.7425	6.42704	6.45193	97.9226	0.654109	0.217723	3.00431	0.00266181	0.00815859	antisense	RP11-421L21.3
ENSG00000233757.2	7.19948	7.30458	6.93708	6.9298	139.406	0.673579	0.189352	3.55729	0.000374705	0.00133239	lincRNA	AC092835.2
ENSG00000234171.1	7.4313	7.3934	6.91587	6.86606	149.859	1.07799	0.184951	5.82849	5.59296e-09	3.53257e-08	antisense	AC108488.3
ENSG00000234912.5	7.99439	8.04163	7.45789	7.50069	226.151	1.04659	0.153553	6.81584	9.37143e-12	7.45229e-11	processed_transcript	LINC00338
ENSG00000235123.1	13.2814	13.3013	12.2384	12.2469	8078.88	1.78083	0.0306719	58.0608	0	0	antisense	DSCAM-AS1
ENSG00000235609.4	6.30855	6.37184	5.84039	5.86902	72.5501	1.19232	0.250364	4.76232	1.91378e-06	9.30223e-06	lincRNA	AF127936.7
ENSG00000236404.4	4.76882	4.64171	4.3454	4.44045	24.7885	1.08074	0.356348	3.03281	0.00242287	0.00747581	antisense	RP11-125B21.2
ENSG00000239002.2	10.1742	10.2386	9.83827	9.80507	1057.3	0.673194	0.0750931	8.96479	3.10875e-19	3.78932e-18	sense_intronic	SCARNA10
ENSG00000239911.1	6.38589	6.42143	5.90591	5.83615	75.3976	1.30123	0.248272	5.24117	1.59561e-07	8.78097e-07	antisense	PRKAG2-AS1
ENSG00000240875.1	9.18146	9.14675	8.51355	8.49263	487.855	1.19271	0.107913	11.0525	2.13149e-28	3.89988e-27	lincRNA	LINC00886
ENSG00000243069.3	6.39771	6.55109	6.08461	5.98479	80.1754	1.05708	0.244386	4.32543	1.52232e-05	6.64266e-05	processed_transcript	ARHGEF26-AS1
ENSG00000243479.3	8.26333	8.17343	7.85319	7.73689	265.756	0.798893	0.146415	5.45634	4.86045e-08	2.81463e-07	antisense	MNX1-AS1
ENSG00000245248.3	5.8743	5.74791	5.18903	5.18176	50.7436	1.7542	0.296626	5.91386	3.34183e-09	2.16414e-08	antisense	USP2-AS1
ENSG00000245522.2	5.11332	4.88024	4.6621	4.68345	30.4026	1.04288	0.341688	3.05215	0.00227205	0.00704719	lincRNA	RP11-540A21.2
ENSG00000246174.3	5.92626	5.99355	5.57684	5.68205	57.3004	0.852547	0.27262	3.12724	0.00176457	0.00559782	antisense	KCTD21-AS1
ENSG00000247228.2	7.90005	7.88855	7.57427	7.43749	213.987	0.755851	0.159776	4.73071	2.23738e-06	1.07729e-05	antisense	RP11-296I10.3
ENSG00000248008.2	8.45251	8.48356	8.14963	8.15861	322.892	0.585097	0.12774	4.58036	4.64187e-06	2.15627e-05	antisense	DYNLL1-AS1
ENSG00000248049.2	7.61347	7.55372	7.23401	7.34541	176.38	0.573998	0.172611	3.32538	0.000882968	0.00296388	antisense	UBA6-AS1
ENSG00000249346.2	7.17562	7.19195	6.08126	5.85696	124.637	2.78278	0.236588	11.7621	6.11758e-32	1.26368e-30	lincRNA	LINC01016
ENSG00000249859.3	10.0808	10.0869	9.66174	9.58252	954.783	0.805802	0.0793709	10.1524	3.23462e-24	4.98131e-23	processed_transcript	PVT1
ENSG00000253125.1	7.34146	7.28801	5.94762	5.76648	137.411	3.41654	0.244294	13.9854	1.91497e-44	5.79445e-43	processed_transcript	RP11-459E5.1
ENSG00000253716.1	7.03386	6.98605	6.66884	6.67064	117.498	0.729743	0.20262	3.60153	0.00031635	0.001139	antisense	RP13-582O9.5
ENSG00000253978.1	3.18046	3.30715	2.97673	2.99541	9.27536	1.37412	0.396099	3.46914	0.000522133	0.00181973	antisense	CTB-178M22.2
ENSG00000254290.1	4.78888	4.73463	4.47365	4.37173	25.6281	1.18977	0.352462	3.37559	0.000736589	0.00250269	lincRNA	RP11-150O12.3
ENSG00000254343.2	6.41259	6.37602	5.4572	5.59128	73.9133	2.18957	0.270319	8.09995	5.49835e-16	5.78609e-15	lincRNA	RP11-760H22.2
ENSG00000254389.2	6.85539	6.84201	6.50528	6.56406	105.701	0.686295	0.211876	3.23914	0.00119891	0.00393925	antisense	RHPN1-AS1
ENSG00000254682.1	7.79191	7.76524	7.25962	7.31161	193.418	0.971104	0.164442	5.90545	3.51677e-09	2.27276e-08	antisense	RP11-660L16.2
ENSG00000255354.1	3.08475	2.99644	2.75031	2.74035	8.37114	1.68744	0.390961	4.31613	1.5879e-05	6.90497e-05	antisense	RP11-148O21.2
ENSG00000255518.1	2.61801	2.64465	2.41719	2.42675	6.19229	1.25484	0.381964	3.28523	0.00101901	0.00338692	antisense	RP11-148O21.4
ENSG00000258486.2	17.2873	17.2787	16.968	16.9477	144619	0.545226	0.0160272	34.0188	1.17566e-253	2.68306e-251	antisense	RN7SL1
ENSG00000258603.1	2.67044	2.90276	2.58034	2.56869	6.86321	1.18937	0.38492	3.08992	0.00200209	0.00629021	antisense	RP3-414A15.10
ENSG00000258655.1	5.9181	6.11962	5.63398	5.71637	59.676	0.892386	0.273483	3.26303	0.00110226	0.0036419	antisense	ARHGAP5-AS1
ENSG00000259001.2	16.9845	16.9553	16.6721	16.6562	116995	0.512428	0.0180746	28.3507	8.21543e-177	1.34152e-174	antisense	RPPH1
ENSG00000259459.1	4.74628	4.66939	4.12119	4.05115	24.9917	2.47371	0.374359	6.60786	3.8991e-11	2.95545e-10	lincRNA	RP11-321G12.1
ENSG00000259977.1	2.68616	2.7606	2.54831	2.50025	6.56157	1.14052	0.384734	2.96444	0.00303231	0.00921368	lincRNA	AL121578.2
ENSG00000259994.1	6.78543	6.72838	6.36414	6.45629	98.6925	0.76402	0.22045	3.46572	0.000528808	0.0018413	sense_overlapping	RP11-305E6.4
ENSG00000260231.1	7.47109	7.66483	7.16773	7.03489	168.85	0.95843	0.18535	5.17092	2.32944e-07	1.26033e-06	antisense	JHDM1D-AS1
ENSG00000260401.1	9.7532	9.74245	9.29339	9.30982	758.985	0.782028	0.0857239	9.12264	7.33176e-20	9.22166e-19	sense_overlapping	RP11-800A3.4
ENSG00000260469.1	4.29224	4.28951	3.91655	3.86375	18.7134	1.67482	0.379062	4.41832	9.947e-06	4.42915e-05	lincRNA	RP11-8P11.3
ENSG00000260920.1	7.3583	7.32982	6.88232	6.8389	143.866	1.00628	0.187419	5.36915	7.91073e-08	4.48369e-07	sense_overlapping	RP1-228H13.5
ENSG00000261088.1	8.02168	8.03549	7.78103	7.72558	240.665	0.530139	0.146853	3.60999	0.000306205	0.00110711	lincRNA	RP11-61A14.3
ENSG00000261373.1	10.2097	10.1941	9.60266	9.54314	1003.5	1.096	0.0772495	14.1878	1.09039e-45	3.3915e-44	antisense	VPS9D1-AS1
ENSG00000261578.1	9.10811	9.124	8.17953	8.30605	460.111	1.57926	0.117469	13.444	3.33692e-41	9.18551e-40	sense_overlapping	RP11-21L23.2
ENSG00000261606.1	2.99565	2.90025	2.70452	2.67425	7.85411	1.46885	0.390402	3.76241	0.000168287	0.000632102	processed_transcript	RP11-414J4.2
ENSG00000261664.1	6.27934	6.30764	5.87064	5.9227	71.1475	0.969282	0.25012	3.87526	0.000106511	0.000411907	antisense	RP11-275F13.1
ENSG00000261705.1	6.69167	6.80203	6.43607	6.37514	98.073	0.777412	0.220823	3.52052	0.000430696	0.00151809	lincRNA	RP11-61A14.2
ENSG00000261824.2	8.23009	8.13199	7.80346	7.77269	260.459	0.742153	0.144569	5.13355	2.8433e-07	1.52528e-06	lincRNA	LINC00662
ENSG00000264198.1	6.07756	6.09163	5.62552	5.61812	61.2241	1.19505	0.266242	4.48856	7.17059e-06	3.24708e-05	lincRNA	RP11-94L15.2
ENSG00000265778.1	4.82528	4.90224	4.47636	4.41951	27.1788	1.4668	0.348603	4.20766	2.58024e-05	0.00010934	antisense	RP11-17M16.2
ENSG00000268205.1	10.5927	10.6705	10.2988	10.3368	1444.4	0.543236	0.066389	8.18262	2.7774e-16	2.96392e-15	lincRNA	CTC-444N24.11
ENSG00000268913.1	7.71016	7.88053	6.79691	6.84656	186.608	1.99108	0.182901	10.8861	1.34213e-27	2.34959e-26	lincRNA	AC026806.2
ENSG00000269954.1	2.87038	2.87947	2.62434	2.63274	7.32912	1.44015	0.389024	3.70196	0.00021394	0.000791803	lincRNA	RP11-148O21.6
ENSG00000269963.1	6.68521	6.6361	6.27394	6.25575	91.5307	0.903125	0.225998	3.99616	6.43787e-05	0.000257711	lincRNA	RP11-73M18.9
ENSG00000270172.1	6.24303	6.34153	6.02102	5.89677	72.0193	0.81782	0.251735	3.24874	0.00115919	0.00381602	lincRNA	RP5-1024G6.8
ENSG00000271359.1	6.41527	6.32932	6.03385	6.02665	75.9605	0.814229	0.243764	3.34024	0.000837071	0.00282534	lincRNA	RP11-84C13.1
ENSG00000272093.1	7.46347	7.54575	7.18697	7.16745	165.552	0.670128	0.17496	3.83019	0.000128046	0.000488805	lincRNA	CTC-365E16.1
ENSG00000272405.1	8.42149	8.51485	7.97328	7.99022	311.255	0.915736	0.13323	6.87332	6.27238e-12	5.07307e-11	antisense	RP11-284F21.10
ENSG00000272695.1	4.34485	4.08229	3.79778	3.76595	18.4132	1.80748	0.386754	4.67347	2.96152e-06	1.40912e-05	lincRNA	GAS6-AS2
ENSG00000272711.1	7.59344	7.56777	6.92552	6.94904	165.218	1.31158	0.178681	7.34034	2.13049e-13	1.90717e-12	lincRNA	RP11-259N19.1
ENSG00000272913.1	8.35162	8.38976	7.94759	7.92648	293.934	0.818432	0.13446	6.08681	1.15182e-09	7.75053e-09	lincRNA	RP11-440D17.3
ENSG00000272933.1	8.18928	8.18087	7.72802	7.89013	262.19	0.697151	0.148277	4.70168	2.58031e-06	1.23394e-05	lincRNA	RP11-47A8.5
ENSG00000273014.1	6.41653	6.5011	6.08675	6.02489	79.6175	0.965642	0.240328	4.01802	5.86901e-05	0.000236383	lincRNA	RP11-225B17.2
ENSG00000273290.1	8.8602	8.8954	8.58823	8.496	426.689	0.613385	0.11497	5.33519	9.54427e-08	5.37259e-07	lincRNA	CTC-297N7.8

## Sheet: RNAseq down
	shCtrl_E2_rep1	shCtrl_E2_rep2	shCtrl_Veh_rep1	shCtrl_Veh_rep2	baseMean	log2FoldChange	lfcSE	stat	pvalue	padj	transcript_type	transcript_name
ENSG00000178947.8	4.82045	4.88721	5.20075	5.13716	33.1125	-0.982628	0.32818	-2.99417	0.0027519	0.00840885	lincRNA	LINC00086
ENSG00000179082.3	5.72605	5.67219	6.13047	6.27493	65.5052	-1.2947	0.267529	-4.83947	1.30185e-06	6.47917e-06	processed_transcript	C9orf106
ENSG00000182310.8	6.59678	6.49043	6.83325	6.93012	107.352	-0.757395	0.215568	-3.51349	0.000442257	0.00155653	processed_transcript	LINC00085
ENSG00000182376.2	5.61014	5.69363	5.92415	6.05567	57.9758	-0.868905	0.275131	-3.15815	0.00158774	0.00509833	antisense	RP5-1142A6.8
ENSG00000182873.4	5.70208	5.62381	5.8998	6.10739	58.8411	-0.899591	0.27773	-3.23909	0.00119914	0.00393931	antisense	RP11-181G12.2
ENSG00000184441.4	6.4635	6.48145	6.86436	6.85828	104.451	-0.860988	0.215001	-4.00458	6.21288e-05	0.000249331	antisense	AP001062.7
ENSG00000185168.5	4.53761	4.44331	4.83778	4.79107	26.1117	-1.1478	0.351279	-3.2675	0.00108501	0.00358804	lincRNA	LINC00482
ENSG00000196295.7	8.71604	8.8299	9.11552	9.00911	490.475	-0.504034	0.113507	-4.44053	8.97357e-06	4.01268e-05	processed_transcript	AC005154.6
ENSG00000197558.7	7.29002	7.39878	7.80047	7.81309	197.596	-0.896495	0.165891	-5.40414	6.51214e-08	3.72668e-07	processed_transcript	SSPO
ENSG00000197670.5	7.52733	7.60562	8.12794	8.07181	238.755	-1.01621	0.152968	-6.64329	3.06755e-11	2.3458e-10	antisense	RP4-724E16.2
ENSG00000203635.2	7.03423	6.86937	7.52312	7.51916	159.788	-1.18123	0.186905	-6.31995	2.61641e-10	1.85618e-09	lincRNA	AC144450.2
ENSG00000203865.5	6.32925	6.45064	6.84446	6.79537	100.787	-0.94002	0.222922	-4.2168	2.47791e-05	0.000105357	processed_transcript	ATP1A1OS
ENSG00000205890.3	7.03867	7.04734	7.76774	7.68473	180.715	-1.3789	0.176428	-7.81565	5.4678e-15	5.42541e-14	antisense	RP11-473M20.5
ENSG00000206573.4	9.0635	9.09269	9.37007	9.41129	611.121	-0.552532	0.0958946	-5.76187	8.31884e-09	5.15964e-08	antisense	SETD5-AS1
ENSG00000213971.3	6.78819	6.8805	7.26623	7.2055	134.951	-0.828314	0.195475	-4.23745	2.26075e-05	9.65176e-05	processed_transcript	RP11-15H20.6
ENSG00000214548.10	7.69915	7.6114	8.01152	7.99902	232.285	-0.682334	0.151782	-4.4955	6.94063e-06	3.14746e-05	lincRNA	MEG3
ENSG00000214894.2	7.16523	7.22212	7.89116	7.87325	200.763	-1.35969	0.167243	-8.13002	4.29206e-16	4.54445e-15	processed_transcript	LINC00243
ENSG00000214922.5	4.6051	4.58544	4.98318	4.97112	28.8255	-1.30811	0.342947	-3.81432	0.000136559	0.000519938	processed_transcript	HLA-F-AS1
ENSG00000215190.4	7.46825	7.48579	7.80372	7.77329	201.604	-0.608576	0.160057	-3.80225	0.00014339	0.00054387	processed_transcript	LINC00680
ENSG00000215447.3	7.80475	7.73787	8.13395	8.11331	251.885	-0.678551	0.145651	-4.65875	3.18143e-06	1.50732e-05	processed_transcript	BX322557.10
ENSG00000215769.4	4.95913	4.84269	5.22042	5.28748	35.0725	-1.11677	0.325372	-3.43229	0.000598511	0.00206693	processed_transcript	hsa-mir-6080
ENSG00000221817.5	6.32012	6.35871	6.71728	6.59676	92.3175	-0.725431	0.228712	-3.17182	0.00151489	0.00487762	processed_transcript	RP11-137L10.6
ENSG00000223745.3	8.37817	8.34624	8.63613	8.76168	376.748	-0.626079	0.124939	-5.01109	5.41222e-07	2.81412e-06	processed_transcript	RP4-717I23.3
ENSG00000223764.2	8.8408	8.86461	9.24947	9.29956	549.486	-0.752525	0.101695	-7.39983	1.36357e-13	1.24356e-12	lincRNA	RP11-54O7.3
ENSG00000223808.1	7.97452	8.0102	8.51912	8.53393	320.23	-0.99334	0.131541	-7.55158	4.30009e-14	4.05639e-13	lincRNA	RP11-428L9.2
ENSG00000223813.2	5.76741	5.78078	6.12125	6.04371	62.1694	-0.780133	0.264102	-2.9539	0.00313781	0.00951135	antisense	AC007255.8
ENSG00000223855.1	6.83133	6.73572	7.14611	7.19822	129.63	-0.834884	0.198093	-4.21461	2.50208e-05	0.000106265	lincRNA	AC147651.3
ENSG00000224086.3	5.80154	5.66992	6.04696	6.0912	61.4607	-0.863425	0.268139	-3.22006	0.00128163	0.00418634	antisense	LL22NC03-86G7.1
ENSG00000224888.3	7.22858	7.18349	7.6096	7.63717	175.714	-0.845107	0.171922	-4.91564	8.84911e-07	4.49745e-06	antisense	RP5-1142A6.2
ENSG00000224950.1	3.56867	3.52287	3.82824	3.76875	13.1757	-1.17666	0.392307	-2.99933	0.00270576	0.00828121	lincRNA	RP5-1086K13.1
ENSG00000224975.1	4.80015	4.71448	5.10817	5.13316	31.9274	-1.19552	0.333385	-3.58601	0.000335778	0.00120324	sense_intronic	INE1
ENSG00000224984.1	5.85177	5.8333	6.45132	6.51174	77.8087	-1.57093	0.252195	-6.22902	4.69367e-10	3.25549e-09	antisense	RP11-524H19.2
ENSG00000225138.3	7.94374	7.89897	8.33231	8.22675	280.423	-0.678186	0.141426	-4.79534	1.62401e-06	7.97358e-06	processed_transcript	CTD-2228K2.7
ENSG00000225361.3	7.50118	7.50649	7.79462	7.75663	201.827	-0.531472	0.159656	-3.32885	0.000872051	0.00293035	antisense	PPP1R26-AS1
ENSG00000225431.1	4.11859	4.0475	4.43958	4.44979	20.2053	-1.45603	0.373489	-3.89845	9.68118e-05	0.000377638	lincRNA	AP001626.1
ENSG00000225855.2	7.37093	7.22628	7.67928	7.66756	183.892	-0.756501	0.171797	-4.40345	1.06545e-05	4.7286e-05	antisense	RUSC1-AS1
ENSG00000226137.3	8.15301	8.09461	8.73665	8.7324	364.953	-1.1355	0.124962	-9.08673	1.02062e-19	1.2744e-18	lincRNA	BAIAP2-AS1
ENSG00000226752.3	9.34366	9.30495	9.73889	9.7521	761.378	-0.744225	0.0865993	-8.59389	8.40757e-18	9.60532e-17	antisense	PSMD5-AS1
ENSG00000228521.2	3.69411	3.64133	4.04226	4.11217	15.78	-1.91394	0.391428	-4.88965	1.01017e-06	5.0944e-06	lincRNA	AC099552.3
ENSG00000228613.1	6.33084	6.23592	6.80696	6.71026	96.1607	-1.08995	0.228281	-4.7746	1.8006e-06	8.78368e-06	antisense	AC144450.1
ENSG00000229267.2	5.51311	5.67337	6.0333	5.94396	57.38	-0.994156	0.28082	-3.54019	0.000399844	0.00141461	antisense	AC072062.1
ENSG00000229989.3	6.70392	6.67575	7.5096	7.40146	149.089	-1.61455	0.196157	-8.23091	1.85794e-16	1.9962e-15	lincRNA	MIR181A1HG
ENSG00000230124.2	7.63829	7.65154	8.07775	8.01509	236.119	-0.770344	0.150706	-5.11156	3.19507e-07	1.69859e-06	antisense	RP5-1180C10.2
ENSG00000230487.3	9.40847	9.392	9.7894	9.78948	790.569	-0.684027	0.0844001	-8.10457	5.29322e-16	5.57333e-15	lincRNA	PSMG3-AS1
ENSG00000230551.3	8.95919	9.09967	9.63963	9.60519	676.243	-1.02699	0.0993203	-10.3402	4.63767e-25	7.35735e-24	processed_transcript	CTB-89H12.4
ENSG00000230590.3	6.41246	6.599	6.96836	6.90468	109.321	-0.907312	0.220155	-4.12124	3.76838e-05	0.000155819	lincRNA	FTX
ENSG00000232725.1	4.19654	4.13236	4.56407	4.4354	21.1401	-1.30052	0.370361	-3.51149	0.000445596	0.00156624	antisense	U52111.14
ENSG00000232729.3	4.98171	5.10287	5.45791	5.45351	39.6684	-1.20346	0.316089	-3.80733	0.000140477	0.000533358	processed_transcript	AC083884.8
ENSG00000233237.2	6.42997	6.67344	7.23845	7.35278	134.14	-1.35952	0.315735	-4.3059	1.66308e-05	7.20869e-05	lincRNA	LINC00472
ENSG00000233621.1	5.89829	6.00812	6.52772	6.57247	81.769	-1.40673	0.247726	-5.67857	1.35823e-08	8.26192e-08	antisense	RP11-422J8.1
ENSG00000233635.2	2.51175	2.47006	2.67575	2.68952	6.17549	-1.13486	0.381757	-2.97272	0.00295175	0.00898186	antisense	AC037445.1
ENSG00000234771.2	6.05622	6.1696	6.47488	6.44328	79.8693	-0.797817	0.242139	-3.29487	0.000984666	0.00328141	antisense	RP11-395P17.3
ENSG00000235584.2	6.96748	6.89977	7.32923	7.32713	144.069	-0.827156	0.18785	-4.40328	1.06626e-05	4.73113e-05	lincRNA	AC008268.1
ENSG00000235621.4	5.65592	5.74612	6.12586	6.29185	65.6867	-1.27492	0.270209	-4.71828	2.37851e-06	1.14234e-05	lincRNA	LINC00494
ENSG00000235706.3	7.3749	7.44252	7.77974	7.78993	198.077	-0.732092	0.162837	-4.49586	6.92902e-06	3.1437e-05	antisense	DICER1-AS1
ENSG00000235823.1	7.83209	7.70568	8.11878	8.0494	247.659	-0.609757	0.150512	-4.05123	5.09498e-05	0.000207279	processed_transcript	LINC00263
ENSG00000235890.1	3.6023	3.57799	3.89783	3.86967	13.8654	-1.36154	0.39133	-3.47925	0.000502819	0.0017563	antisense	TSPEAR-AS1
ENSG00000236008.1	7.3797	7.31091	7.8667	7.86982	203.952	-1.03937	0.162618	-6.39151	1.64255e-10	1.18889e-09	lincRNA	AC011747.4
ENSG00000236824.1	4.70056	4.77033	5.16312	5.09669	31.9067	-1.2666	0.335787	-3.77202	0.000161929	0.000609914	lincRNA	BCYRN1
ENSG00000236901.3	7.09506	7.10398	7.50598	7.55834	164.442	-0.880445	0.177508	-4.96002	7.04859e-07	3.62515e-06	sense_intronic	MIR600HG
ENSG00000237126.4	4.7886	4.7939	5.18128	5.22189	33.4263	-1.32301	0.329986	-4.0093	6.08989e-05	0.000244706	antisense	AC073254.1
ENSG00000237188.3	6.23919	6.18229	6.7682	6.59065	91.393	-1.08405	0.236457	-4.58457	4.54932e-06	2.11624e-05	antisense	RP11-337C18.8
ENSG00000239653.1	7.44846	7.59659	7.89554	7.98838	219.075	-0.7953	0.162378	-4.89784	9.6895e-07	4.89958e-06	antisense	PSMD6-AS2
ENSG00000242086.4	8.64199	8.78511	9.18748	9.18247	511.419	-0.824619	0.110579	-7.45729	8.83211e-14	8.16087e-13	lincRNA	LINC00969
ENSG00000242798.1	5.28735	5.17119	5.57267	5.52115	43.1122	-0.922324	0.30316	-3.04236	0.00234729	0.00726272	antisense	RP11-506M12.1
ENSG00000244468.1	7.42384	7.35087	7.81954	7.7419	197.079	-0.781753	0.16512	-4.73447	2.19627e-06	1.05938e-05	antisense	RP11-206M11.7
ENSG00000245080.4	3.71221	3.64169	3.9473	3.94316	14.5292	-1.20875	0.389065	-3.10681	0.0018912	0.00596852	antisense	MIR3150B
ENSG00000245156.1	6.62127	6.63025	7.21333	7.32667	132.96	-1.37912	0.202283	-6.81781	9.24372e-12	7.35382e-11	lincRNA	RP11-867G23.3
ENSG00000245532.4	13.1503	13.1478	14.0934	14.087	14187.3	-1.59169	0.02434	-65.3941	0	0	lincRNA	NEAT1
ENSG00000245571.2	7.08659	7.12314	7.29983	7.48191	154.505	-0.590716	0.187994	-3.14221	0.00167675	0.00535418	lincRNA	AP001258.4
ENSG00000245849.2	6.25881	6.05606	6.62501	6.61682	87.8817	-1.08617	0.240682	-4.51288	6.39526e-06	2.91269e-05	processed_transcript	RAD51-AS1
ENSG00000246451.2	6.17052	6.08533	6.5987	6.63783	86.997	-1.15833	0.236069	-4.90676	9.25937e-07	4.69337e-06	antisense	RP11-894P9.1
ENSG00000246548.3	3.97607	3.98074	4.33002	4.29445	18.4469	-1.37004	0.377774	-3.62662	0.000287159	0.00104362	lincRNA	RP11-7F17.5
ENSG00000246985.3	6.5175	6.48873	6.78593	6.84112	102.827	-0.695215	0.215566	-3.22507	0.00125942	0.0041202	processed_transcript	SOCS2-AS1
ENSG00000247011.2	5.66536	5.72797	6.33753	6.44204	72.8501	-1.73018	0.264224	-6.54815	5.82546e-11	4.3615e-10	lincRNA	RP11-700H6.1
ENSG00000248019.2	3.82381	3.71296	4.12817	3.99875	15.8955	-1.27106	0.388291	-3.27347	0.00106234	0.00352045	antisense	FAM13A-AS1
ENSG00000248329.1	3.57515	3.62805	3.86232	3.97375	14.1099	-1.42168	0.392514	-3.622	0.000292339	0.00106163	processed_transcript	RP11-366M4.3
ENSG00000249476.1	4.41715	4.36583	4.91933	4.82238	26.7904	-1.74724	0.357849	-4.88263	1.04683e-06	5.27648e-06	lincRNA	CTD-2587M2.1
ENSG00000249592.1	6.09497	6.05424	6.46858	6.32583	77.2201	-0.77307	0.246502	-3.13616	0.00171174	0.0054503	antisense	RP11-440L14.1
ENSG00000249846.2	3.88785	3.90963	4.30392	4.28628	18.1632	-1.67405	0.38252	-4.37636	1.20678e-05	5.32096e-05	lincRNA	RP11-77P16.4
ENSG00000250616.2	4.62561	4.612	4.97246	4.93704	28.5491	-1.14164	0.341704	-3.34102	0.000834709	0.00281787	antisense	RP11-455F5.3
ENSG00000251143.1	5.83948	5.89432	6.23001	6.25749	68.4269	-0.926221	0.255801	-3.62086	0.000293624	0.00106569	antisense	RP11-849H4.4
ENSG00000251562.3	17.5712	17.5888	18.2763	18.264	265751	-1.15995	0.0158181	-73.3302	0	0	lincRNA	MALAT1
ENSG00000253352.4	12.0582	12.0877	12.6127	12.6028	5397.83	-0.900376	0.0353631	-25.4609	5.342e-143	6.36403e-141	antisense	TUG1
ENSG00000254162.1	6.23345	6.18352	6.87577	6.75221	98.0792	-1.38922	0.230419	-6.02912	1.64859e-09	1.09725e-08	lincRNA	RP11-48B3.3
ENSG00000254911.2	8.2747	8.24147	8.68225	8.66734	363.287	-0.770572	0.122614	-6.28452	3.28861e-10	2.31831e-09	antisense	SCARNA9
ENSG00000255571.2	7.97332	7.87345	8.23424	8.13769	269.298	-0.502483	0.144614	-3.47464	0.000511538	0.00178576	lincRNA	LINC00925
ENSG00000257354.1	2.66306	2.6777	2.89086	2.85699	7.00116	-1.19526	0.38837	-3.07762	0.00208658	0.0065275	antisense	RP11-631N16.2
ENSG00000257410.1	4.83472	4.671	5.13061	5.02492	31.4496	-1.05576	0.339164	-3.11284	0.00185299	0.00586063	lincRNA	RP11-2H8.2
ENSG00000258297.1	8.26792	8.20146	8.5401	8.62069	346.165	-0.647899	0.127625	-5.07659	3.84267e-07	2.02695e-06	antisense	RP11-658F2.8
ENSG00000258441.1	7.00721	7.15007	7.45171	7.52247	160.317	-0.810857	0.184237	-4.40117	1.07668e-05	4.77512e-05	processed_transcript	LINC00641
ENSG00000258891.1	4.19188	4.20443	4.57826	4.42953	21.2083	-1.15783	0.368777	-3.13964	0.00169156	0.0053933	antisense	RP5-1021I20.5
ENSG00000259070.1	3.58846	3.57997	3.86983	3.84419	13.6157	-1.25814	0.391263	-3.21559	0.00130175	0.00424839	lincRNA	LINC00639
ENSG00000259820.1	6.12995	6.30935	6.59673	6.64238	88.3309	-0.887484	0.238018	-3.72865	0.000192509	0.00071725	lincRNA	AC083843.1
ENSG00000259932.1	6.82156	6.88686	7.10959	7.19475	130.294	-0.623553	0.19652	-3.17298	0.00150882	0.00486055	sense_intronic	CTD-2651B20.7
ENSG00000259943.1	5.87149	5.93034	6.17879	6.27232	68.3094	-0.796867	0.256173	-3.11066	0.00186668	0.00589604	antisense	RP1-39G22.7
ENSG00000260005.2	5.30654	5.24071	5.66352	5.6183	45.4807	-1.0504	0.297446	-3.53139	0.000413386	0.00145953	antisense	AC027601.1
ENSG00000260035.1	5.34075	5.53755	5.96695	5.81928	53.4589	-1.16075	0.295993	-3.92156	8.7978e-05	0.000344813	sense_intronic	CTD-2651B20.6
ENSG00000260064.1	4.12551	4.16828	4.52245	4.47775	20.8924	-1.3604	0.370428	-3.6725	0.000240188	0.000884112	sense_intronic	RP11-18F14.4
ENSG00000260121.1	7.36343	7.27619	7.7278	7.70401	188.266	-0.794742	0.167525	-4.74401	2.0953e-06	1.01274e-05	antisense	RP5-1142A6.9
ENSG00000260285.1	8.61038	8.68562	9.00729	8.95537	458.047	-0.590928	0.111662	-5.2921	1.20922e-07	6.74075e-07	antisense	RP11-600F24.7
ENSG00000260317.1	5.42184	5.3771	5.85426	5.91304	52.7454	-1.33361	0.286388	-4.65665	3.21401e-06	1.52199e-05	lincRNA	RP11-48B3.4
ENSG00000260336.1	10.1018	10.1682	10.5452	10.5387	1326.17	-0.692526	0.0677792	-10.2174	1.65747e-24	2.57765e-23	sense_overlapping	RP11-395B7.7
ENSG00000260400.1	4.91961	4.99239	5.45023	5.52612	40.1282	-1.60348	0.320093	-5.00943	5.45908e-07	2.8377e-06	sense_overlapping	RP11-119F7.5
ENSG00000260565.2	7.88617	7.91459	8.23215	8.16789	268.905	-0.56231	0.141205	-3.98223	6.82708e-05	0.000272249	processed_transcript	ERVK13-1
ENSG00000260618.1	4.40133	4.41403	4.7034	4.80584	24.8585	-1.24985	0.355843	-3.51236	0.000444147	0.00156255	antisense	RP11-23N2.4
ENSG00000260793.2	7.52883	7.5282	7.9931	8.02469	226.33	-0.933841	0.153722	-6.07485	1.24101e-09	8.32706e-09	antisense	RP5-882C2.2
ENSG00000260822.1	9.18122	8.98892	9.48733	9.51603	645.359	-0.712947	0.16473	-4.32798	1.50481e-05	6.56929e-05	sense_overlapping	GS1-358P8.4
ENSG00000260884.1	4.14836	4.03977	4.55354	4.35956	20.6992	-1.42004	0.37677	-3.769	0.000163904	0.000617107	lincRNA	AC009120.5
ENSG00000260912.1	7.20207	7.19621	7.54472	7.62275	172.161	-0.778778	0.173961	-4.47673	7.57946e-06	3.41834e-05	sense_overlapping	RP11-363E7.4
ENSG00000261015.1	4.67429	4.61541	5.00184	5.00815	29.4893	-1.22222	0.340134	-3.59335	0.000326453	0.00117248	sense_overlapping	RP1-90J20.11
ENSG00000261116.1	9.73328	9.82879	10.4469	10.4355	1177.2	-1.13013	0.0748384	-15.101	1.59566e-51	5.72442e-50	sense_overlapping	RP3-523K23.2
ENSG00000261211.1	6.30825	6.26654	6.65267	6.63868	90.6623	-0.826979	0.227659	-3.63253	0.000280659	0.00102275	lincRNA	RP1-80N2.3
ENSG00000261452.1	6.92203	6.91842	7.48307	7.4496	154.039	-1.12793	0.184691	-6.10715	1.01425e-09	6.8516e-09	lincRNA	RP11-509E16.1
ENSG00000261505.1	6.43752	6.48808	6.88917	6.8169	103.904	-0.858093	0.217274	-3.94936	7.8362e-05	0.000309817	antisense	LA16c-358B7.3
ENSG00000261584.1	4.25829	4.20113	4.433	4.633	21.6746	-1.15514	0.368716	-3.13287	0.00173103	0.00550617	lincRNA	RP11-457M11.5
ENSG00000262580.1	6.41711	6.35189	6.71344	6.68679	95.0453	-0.720498	0.223074	-3.22985	0.00123854	0.00405818	antisense	RP11-334C17.5
ENSG00000263272.1	5.90292	6.1431	6.47354	6.41203	78.1103	-0.940719	0.256521	-3.66722	0.000245204	0.000901349	antisense	CTC-524C5.2
ENSG00000263345.1	6.24003	6.12074	6.81285	6.7657	96.3708	-1.41182	0.231448	-6.09992	1.06124e-09	7.15627e-09	antisense	RP1-59D14.5
ENSG00000263931.1	5.31017	5.33682	5.79404	5.7691	49.2965	-1.27162	0.292075	-4.35376	1.33823e-05	5.87319e-05	lincRNA	RP11-180P8.1
ENSG00000263934.2	11.451	11.4947	12.0006	12.0008	3549.35	-0.890015	0.0429443	-20.7249	2.06707e-95	1.46099e-93	lincRNA	SNORD3A
ENSG00000264112.1	6.56443	6.60724	7.15443	7.21849	126.143	-1.28891	0.204342	-6.30761	2.83385e-10	2.00444e-09	lincRNA	RP11-159D12.2
ENSG00000266411.1	4.80863	4.86238	5.3789	5.24953	35.9866	-1.4945	0.329765	-4.532	5.84283e-06	2.67395e-05	lincRNA	RP11-180P8.3
ENSG00000266934.1	6.74251	6.71989	7.34262	7.28028	137.889	-1.22823	0.19566	-6.27736	3.44379e-10	2.4196e-09	sense_intronic	RP11-332H18.3
ENSG00000267034.1	3.78204	3.74058	4.05508	3.98871	15.32	-1.13993	0.386098	-2.95244	0.00315276	0.00954901	lincRNA	RP11-384O8.1
ENSG00000267896.1	3.93108	3.92994	4.21284	4.18664	17.1897	-1.1173	0.379244	-2.94612	0.0032179	0.00973232	antisense	AC018766.4
ENSG00000268006.1	7.8146	7.77456	8.17852	8.2891	266.846	-0.843413	0.145411	-5.8002	6.62348e-09	4.14613e-08	antisense	PTOV1-AS1
ENSG00000268015.1	3.49411	3.51826	3.7837	3.87558	13.2998	-1.52505	0.39411	-3.86961	0.000109009	0.000420795	antisense	CTD-2525I3.3
ENSG00000268366.1	4.45623	4.50549	4.84542	4.78804	25.956	-1.16808	0.351511	-3.32302	0.000890473	0.00298643	antisense	CTC-492K19.4
ENSG00000269352.1	6.75916	6.70895	7.07343	7.10471	123.16	-0.766406	0.200262	-3.82702	0.000129703	0.000494832	antisense	AC018766.5
ENSG00000269487.1	3.79773	3.81423	4.25473	3.99327	16.6498	-1.32094	0.388325	-3.40164	0.00066982	0.00229435	antisense	CTB-174O21.2
ENSG00000269821.1	10.6131	10.6517	11.1528	11.117	1958.58	-0.853564	0.0566201	-15.0753	2.35543e-51	8.40237e-50	antisense	KCNQ1OT1
ENSG00000269825.1	7.82311	7.8507	8.2256	8.18351	265.317	-0.693333	0.141984	-4.88317	1.04392e-06	5.26321e-06	sense_intronic	CTD-3099C6.9
ENSG00000269959.1	4.87403	4.8404	5.28485	5.23684	34.9046	-1.28212	0.325654	-3.93706	8.24865e-05	0.000324768	lincRNA	hsa-mir-125a
ENSG00000269996.1	7.16851	7.26004	7.74087	7.72493	185.846	-1.02108	0.170771	-5.97925	2.2417e-09	1.47541e-08	lincRNA	RP11-343N15.5
ENSG00000270012.1	5.63622	5.70186	6.06298	6.03519	59.8462	-0.969331	0.269793	-3.59287	0.000327057	0.00117443	lincRNA	LL0XNC01-7P3.1
ENSG00000270157.1	5.54035	5.52614	5.90527	6.00099	55.7613	-1.12245	0.278605	-4.02881	5.60594e-05	0.000226606	sense_intronic	RP5-894A10.6
ENSG00000270589.1	4.37322	4.3213	4.61255	4.67857	23.2642	-1.10577	0.358913	-3.08089	0.00206381	0.00646266	antisense	RP11-348N5.7
ENSG00000271430.1	5.64488	5.68792	5.95194	6.11862	59.5624	-0.953641	0.274015	-3.48025	0.000500947	0.00175008	sense_intronic	RP3-368A4.5
ENSG00000271533.1	5.32043	5.1084	5.51967	5.7071	44.9219	-1.14101	0.312933	-3.64618	0.000266167	0.000973684	sense_intronic	RP3-368A4.6
ENSG00000271721.1	6.18743	6.13602	6.647	6.55274	86.696	-1.02646	0.235892	-4.3514	1.35274e-05	5.93138e-05	antisense	RP11-337C18.9
ENSG00000272070.1	6.06455	5.91543	6.37312	6.40535	75.6539	-0.975452	0.249998	-3.90183	9.5468e-05	0.000372703	lincRNA	AC005618.6
ENSG00000272072.1	5.20014	5.03372	5.46005	5.46813	40.617	-1.03111	0.312644	-3.29802	0.000973685	0.00325053	antisense	CTA-363E19.2
ENSG00000272078.1	5.27787	5.31425	5.59653	5.65364	45.1312	-0.927218	0.296476	-3.12747	0.00176319	0.00559531	antisense	RP4-734G22.3
ENSG00000272112.1	3.7576	3.70152	4.01836	3.97625	15.0536	-1.18624	0.387238	-3.06335	0.00218877	0.00681902	lincRNA	CTB-113P19.5
ENSG00000272145.1	5.36012	5.40655	5.69461	5.74843	48.1368	-0.930186	0.290356	-3.20361	0.00135718	0.00441639	antisense	RP4-739H11.4
ENSG00000272320.1	5.08962	4.93981	5.39927	5.48953	39.6124	-1.30788	0.318643	-4.10454	4.05113e-05	0.000166855	antisense	RP11-506K6.4
ENSG00000272501.1	4.78069	4.69086	5.10157	4.98868	30.6913	-1.01929	0.337142	-3.02333	0.00250011	0.00769532	antisense	XXbac-BPG299F13.17
ENSG00000272732.1	5.43959	5.50016	5.97773	6.02605	56.7496	-1.41075	0.281445	-5.01252	5.37222e-07	2.79485e-06	lincRNA	RP5-1159O4.2
ENSG00000272734.1	7.38339	7.29773	7.69491	7.79706	191.974	-0.815565	0.168558	-4.83847	1.3084e-06	6.50833e-06	processed_transcript	ADIRF-AS1
ENSG00000272808.1	5.35062	5.45029	5.95176	5.77761	52.3988	-1.23604	0.293457	-4.21199	2.53131e-05	0.000107435	lincRNA	RP11-66B24.7
ENSG00000272894.1	6.0427	6.24946	6.69811	6.55118	87.7854	-1.06053	0.247352	-4.28752	1.8068e-05	7.80312e-05	lincRNA	RP5-1159O4.1
ENSG00000272918.1	6.26504	6.26272	6.68673	6.58326	89.8645	-0.852262	0.230868	-3.69155	0.000222893	0.00082349	antisense	CTB-152G17.6
ENSG00000273066.1	5.95699	5.95009	6.43251	6.43748	76.7372	-1.1674	0.246765	-4.73082	2.23616e-06	1.07697e-05	processed_transcript	RP11-216L13.19
ENSG00000273151.1	8.8646	8.76351	9.39302	9.39098	578.069	-1.04094	0.102302	-10.1752	2.55964e-24	3.96441e-23	antisense	RP11-449P15.2
ENSG00000273230.1	7.24204	7.28966	7.69731	7.67564	183.33	-0.832492	0.168879	-4.92953	8.24287e-07	4.20739e-06	lincRNA	RP11-1246C19.1
ENSG00000273270.1	7.90994	7.84415	8.28635	8.23894	275.247	-0.734482	0.140686	-5.2207	1.78249e-07	9.75578e-07	lincRNA	RP11-212P7.2
ENSG00000273329.1	8.35069	8.22933	8.5454	8.65799	354.732	-0.586838	0.130743	-4.48849	7.17313e-06	3.24745e-05	lincRNA	RP11-448A19.1
ENSG00000273373.1	4.83421	4.69431	5.20334	5.20733	33.6407	-1.43806	0.334667	-4.297	1.73127e-05	7.49401e-05	antisense	RP5-1074L1.4
ENSG00000273483.1	3.15597	3.16281	3.46261	3.48416	10.4732	-1.66226	0.396591	-4.19137	2.77269e-05	0.000116998	antisense	RP4-671G15.2

## Sheet: GROseq up
	MCF7_shCtrl_E2_rep1	MCF7_shCtrl_E2_rep2	MCF7_shCtrl_Veh_rep1	MCF7_shCtrl_Veh_rep2	baseMean	log2FoldChange	lfcSE	stat	pvalue	padj	transcript_type	transcript_name
ENSG00000006062.9	10.0829	10.1196	8.88832	9.00163	875.595	1.94829	0.10373	18.7823	1.05323e-78	1.19525e-76	processed_transcript	MAP3K14
ENSG00000012171.13	7.37634	7.41518	6.8351	6.72435	144.679	1.21409	0.220563	5.50451	3.70201e-08	4.66248e-07	processed_transcript	SEMA3B
ENSG00000145063.10	6.78685	6.77831	5.96935	5.78352	92.9031	2.01698	0.286775	7.03332	2.01674e-12	3.86936e-11	lincRNA	AC062028.1
ENSG00000170846.11	9.41395	9.48345	8.9442	8.91037	605.9	0.884383	0.112655	7.85035	4.14878e-15	9.60023e-14	lincRNA	AC093323.3
ENSG00000175873.3	8.59361	8.59397	8.2589	8.31099	351.943	0.54055	0.141172	3.82901	0.000128658	0.00093683	lincRNA	AC004840.9
ENSG00000177822.3	7.90451	7.90694	7.4388	7.64831	216.314	0.653809	0.18726	3.49144	0.000480419	0.00302799	antisense	AC108142.1
ENSG00000179859.7	6.28139	6.36072	5.92177	5.90617	71.6848	0.9361	0.293742	3.18681	0.00143853	0.00795518	antisense	AC025335.1
ENSG00000196273.3	4.05032	3.94165	3.59256	3.48706	14.8427	2.14183	0.522705	4.09759	4.17481e-05	0.000335226	lincRNA	LINC00523
ENSG00000196668.3	7.36096	7.37549	6.53842	6.41028	137.744	1.81115	0.234617	7.7196	1.16692e-14	2.62343e-13	processed_transcript	LINC00173
ENSG00000196696.8	9.72932	9.7047	9.1593	9.08759	719.158	1.00021	0.104349	9.58526	9.22247e-22	2.91498e-20	processed_transcript	PDXDC2P
ENSG00000196810.4	8.76644	8.78258	8.49397	8.47848	400.968	0.500206	0.132141	3.78541	0.000153455	0.00109828	antisense	CTBP1-AS2
ENSG00000198106.7	6.38752	6.4214	5.33536	5.38721	72.064	2.61817	0.331317	7.90233	2.73748e-15	6.4251e-14	lincRNA	SNX29P2
ENSG00000198221.7	6.14605	6.14052	5.6647	5.58726	62.3123	1.25137	0.31549	3.96644	7.29546e-05	0.00055569	processed_transcript	MLLT4-AS1
ENSG00000203620.2	4.01658	4.06854	3.53773	3.5577	15.2872	2.40066	0.520387	4.61323	3.96462e-06	3.80843e-05	lincRNA	RP11-84A19.2
ENSG00000204055.4	8.29679	8.25535	7.66604	7.5506	262.767	1.21088	0.168781	7.17424	7.27104e-13	1.46347e-11	antisense	RP11-247A12.2
ENSG00000204380.2	7.30288	7.23185	6.46621	6.63406	130.874	1.44169	0.237584	6.06814	1.29401e-09	1.93875e-08	antisense	AC005042.4
ENSG00000206113.3	7.90972	7.79581	6.0626	6.36273	190.136	2.8042	0.440056	6.37237	1.86135e-10	3.02682e-09	lincRNA	RP11-503N18.1
ENSG00000214049.6	5.47916	5.52233	4.73337	4.78005	39.8496	2.25376	0.400047	5.63373	1.76354e-08	2.31396e-07	processed_transcript	UCA1
ENSG00000214145.2	4.8645	4.99983	4.39473	4.48341	27.6764	1.65046	0.437239	3.77473	0.000160179	0.00114333	lincRNA	LINC00887
ENSG00000215417.6	8.80103	8.7764	8.43053	8.31686	392.806	0.720656	0.137944	5.22427	1.74841e-07	2.03061e-06	processed_transcript	MIR17HG
ENSG00000215841.3	5.66274	5.43494	4.93928	4.94038	41.5682	1.74905	0.385659	4.53522	5.75444e-06	5.38233e-05	antisense	RP11-800A3.2
ENSG00000223652.2	3.13772	3.03902	2.77073	2.79375	8.06147	1.91992	0.545532	3.51935	0.000432613	0.00276672	antisense	AC106786.1
ENSG00000223734.2	4.20603	3.99266	3.68725	3.74893	15.9763	1.64298	0.504403	3.25728	0.00112485	0.00640764	antisense	RP11-644K8.1
ENSG00000223749.3	9.04313	9.09611	7.93829	7.98687	432.279	1.94573	0.139529	13.9451	3.37197e-44	2.09741e-42	lincRNA	MIR503HG
ENSG00000224592.1	7.95508	7.83602	7.16367	7.25872	201.978	1.28517	0.19298	6.65958	2.74611e-11	4.81021e-10	lincRNA	RP5-884C9.2
ENSG00000224596.3	7.40353	7.61061	6.94503	7.10145	160.565	0.927261	0.220466	4.20592	2.6002e-05	0.000216278	antisense	ZMIZ1-AS1
ENSG00000224652.1	8.44286	8.49243	8.24354	8.11276	324.525	0.507075	0.151168	3.35438	0.000795444	0.0047198	lincRNA	LINC00885
ENSG00000224842.2	9.21904	9.23619	8.79986	8.86111	534.151	0.675841	0.117361	5.75864	8.47952e-09	1.15672e-07	antisense	RP11-123K19.1
ENSG00000225092.2	7.19864	7.21304	6.81278	6.72686	130.977	0.869533	0.225685	3.85287	0.000116742	0.000857973	sense_intronic	RP11-405O10.2
ENSG00000225465.6	9.30216	9.38959	7.25525	7.16777	527.749	3.95701	0.169804	23.3034	4.09676e-120	8.91881e-118	antisense	RFPL1S
ENSG00000225484.2	7.74891	7.90281	7.40803	7.46263	203.313	0.725905	0.189434	3.83197	0.00012712	0.000926585	lincRNA	RP11-773D16.1
ENSG00000225511.2	6.71888	6.65429	5.807	5.68242	86.965	2.16255	0.295329	7.32252	2.43359e-13	5.05064e-12	processed_transcript	LINC00475
ENSG00000226239.1	3.52182	3.7431	3.26412	3.23373	11.8393	1.99849	0.534566	3.73852	0.000185108	0.00129654	antisense	RP1-310O13.7
ENSG00000226276.1	9.15524	9.10415	8.09278	8.07087	452.257	1.83448	0.134776	13.6114	3.42795e-42	2.02591e-40	lincRNA	AC093382.1
ENSG00000226281.2	7.05327	7.15132	5.53622	5.57301	115.689	3.68334	0.316436	11.6401	2.57808e-31	1.15796e-29	lincRNA	RP1-80N2.2
ENSG00000226330.1	7.65482	7.60735	6.76785	6.62215	164.145	1.83811	0.21867	8.40586	4.24734e-17	1.07877e-15	antisense	RP11-739N20.2
ENSG00000226471.2	10.43	10.4518	9.99702	10.0321	1229.06	0.703374	0.0802674	8.76289	1.90305e-18	5.15249e-17	antisense	CTA-292E10.6
ENSG00000226645.1	5.90186	5.72385	5.19549	5.22478	49.5113	1.60992	0.356362	4.51765	6.2529e-06	5.81475e-05	antisense	AP006216.10
ENSG00000226883.1	3.85176	3.65065	3.33884	3.38354	12.6551	1.95127	0.529015	3.6885	0.000225584	0.00155053	antisense	RP4-782L23.2
ENSG00000226891.2	7.03329	7.07468	6.67786	6.50471	117.575	0.935897	0.242614	3.85755	0.00011453	0.000842292	lincRNA	RP11-182I10.3
ENSG00000227036.2	8.22768	8.31166	6.95796	6.99945	249.091	2.43682	0.189706	12.8452	9.14564e-38	4.84174e-36	lincRNA	LINC00511
ENSG00000227070.1	9.61662	9.66686	9.17352	9.20309	702.429	0.762566	0.103969	7.33455	2.22461e-13	4.63497e-12	antisense	RP11-191G24.1
ENSG00000227252.1	7.69626	7.74354	7.38196	7.3181	189.469	0.693254	0.189703	3.65442	0.000257761	0.00174582	antisense	AC105760.2
ENSG00000227398.3	9.21491	9.31237	8.39327	8.40041	504.942	1.49558	0.127513	11.7288	9.0747e-32	4.13694e-30	antisense	KIF9-AS1
ENSG00000227432.1	6.30339	6.27138	5.79267	5.66429	68.4182	1.31374	0.307048	4.27863	1.88051e-05	0.000160675	antisense	AC053503.11
ENSG00000227533.1	9.62773	9.57895	9.29459	9.33137	711.747	0.488786	0.102624	4.76288	1.90849e-06	1.91793e-05	lincRNA	SLC2A1-AS1
ENSG00000227803.2	6.50713	6.48165	5.69688	5.79535	77.1683	1.73369	0.298495	5.80809	6.3188e-09	8.74832e-08	antisense	RP11-239H6.2
ENSG00000227911.3	6.69928	6.70347	6.31363	6.26451	92.939	0.885699	0.26153	3.38661	0.000707629	0.00426356	lincRNA	RP11-141M1.1
ENSG00000228021.3	4.57826	4.70367	3.96991	3.96245	22.8341	2.81	0.493581	5.69307	1.24773e-08	1.67004e-07	lincRNA	RP11-383C5.3
ENSG00000228150.1	7.76193	7.64591	7.16999	7.21865	182.111	0.968805	0.197443	4.90677	9.25892e-07	9.72142e-06	sense_intronic	RP11-84A14.4
ENSG00000228630.1	8.84129	8.78152	8.34502	8.35466	394.71	0.805551	0.135428	5.94819	2.71128e-09	3.94309e-08	antisense	HOTAIR
ENSG00000229262.1	2.92398	2.79541	2.58342	2.60675	6.9172	1.72434	0.545468	3.16122	0.00157112	0.00858604	antisense	RP4-726N1.2
ENSG00000229512.1	5.51389	5.22643	4.64728	4.6546	36.9737	2.2503	0.418642	5.37524	7.64791e-08	9.30263e-07	sense_intronic	AC068580.5
ENSG00000229525.1	6.62591	6.58839	6.05612	5.8103	84.1299	1.48646	0.293999	5.05599	4.28168e-07	4.70875e-06	antisense	AC053503.4
ENSG00000229587.2	7.38897	7.44168	6.8493	6.83091	147.483	1.13115	0.215619	5.24608	1.55374e-07	1.8134e-06	sense_intronic	RP11-197P3.5
ENSG00000229630.1	3.84074	3.78566	3.37635	3.39659	13.0918	2.18734	0.527761	4.14456	3.4046e-05	0.000277559	lincRNA	RP11-124O11.2
ENSG00000229893.1	6.96976	6.92297	5.92776	5.94324	103.08	2.23485	0.27359	8.1686	3.11986e-16	7.64204e-15	antisense	AC004549.6
ENSG00000229980.4	7.69313	7.70485	7.10392	7.18745	179.905	1.04922	0.197012	5.32568	1.00577e-07	1.20168e-06	processed_transcript	TOB1-AS1
ENSG00000230102.3	8.40991	8.27392	8.02958	8.10458	298.779	0.495719	0.158597	3.12565	0.00177411	0.00952457	processed_transcript	RP11-407B7.1
ENSG00000230176.2	6.38853	6.25304	5.16547	5.00003	68.9176	3.35624	0.375029	8.94928	3.57823e-19	1.00186e-17	antisense	RP4-779E11.3
ENSG00000230212.2	5.16826	5.14046	4.62124	4.58728	31.8344	1.75879	0.415697	4.23094	2.32713e-05	0.00019547	sense_intronic	AP000688.14
ENSG00000230314.2	7.40739	7.46152	6.28985	6.3084	142.426	2.34466	0.240388	9.75366	1.77929e-22	5.80447e-21	antisense	ELOVL2-AS1
ENSG00000230550.1	3.06092	2.92395	2.71881	2.69004	7.57684	1.82774	0.545761	3.34897	0.000811115	0.00480432	antisense	RP11-74C13.3
ENSG00000230735.1	6.63753	6.61392	6.20323	6.17411	87.7953	0.954559	0.268535	3.55469	0.000378422	0.00245399	sense_intronic	RP11-413E1.4
ENSG00000230825.1	5.48555	5.38398	4.87281	4.9442	38.5403	1.52907	0.386572	3.95546	7.63886e-05	0.00057957	processed_transcript	AC005532.5
ENSG00000230848.1	5.92076	6.00958	5.0014	4.94458	54.1703	2.79817	0.378373	7.39529	1.41105e-13	2.97772e-12	antisense	RP11-379C10.1
ENSG00000230978.1	6.30039	6.24147	5.04482	5.11325	66.4014	3.25264	0.369808	8.79548	1.4244e-18	3.87128e-17	lincRNA	LINC00160
ENSG00000231312.2	8.72829	8.84929	8.34145	8.31868	389.261	0.799616	0.140226	5.70232	1.18189e-08	1.58588e-07	antisense	AC007246.3
ENSG00000231437.3	6.63889	6.79397	5.71646	5.70856	88.7795	2.31789	0.298045	7.77698	7.42744e-15	1.67687e-13	lincRNA	RP11-88H9.2
ENSG00000231611.1	4.39567	4.67451	4.01617	4.0749	21.5506	1.86953	0.480153	3.89362	9.87611e-05	0.000733403	lincRNA	AP006216.11
ENSG00000231863.1	5.62752	5.54693	4.90029	5.10974	42.6169	1.59803	0.384388	4.15732	3.21999e-05	0.000263843	antisense	RP3-428L16.1
ENSG00000231999.2	3.77031	3.91831	3.51356	3.48304	13.495	1.6254	0.517078	3.14344	0.00166973	0.00905304	antisense	RP5-1007M22.2
ENSG00000232645.1	5.22284	5.29936	4.9323	4.68318	34.7747	1.30402	0.411694	3.16746	0.00153778	0.0084341	antisense	RP3-322G13.5
ENSG00000232973.7	9.02842	9.02112	8.50195	8.55665	454.154	0.853855	0.126821	6.73277	1.66462e-11	2.97193e-10	antisense	CYP1B1-AS1
ENSG00000233006.2	10.1972	10.2103	9.5861	9.60002	1003.66	1.01641	0.0881561	11.5297	9.34871e-31	4.12097e-29	processed_transcript	AC034220.3
ENSG00000233030.2	6.87389	6.93823	6.18465	6.26235	102.637	1.45299	0.259454	5.60018	2.14135e-08	2.77725e-07	antisense	RP11-196G18.3
ENSG00000233554.1	6.22688	6.10121	5.3741	5.44819	61.9025	1.88575	0.331695	5.68518	1.30678e-08	1.74469e-07	antisense	RP11-326F20.5
ENSG00000233633.1	5.54449	5.27766	4.57817	4.54322	37.9992	2.76524	0.431749	6.40475	1.50617e-10	2.46807e-09	lincRNA	AC093326.3
ENSG00000233844.1	7.77563	7.80105	6.8441	6.86042	182.435	1.80993	0.204019	8.87137	7.22483e-19	1.99924e-17	sense_intronic	KCNQ5-IT1
ENSG00000234134.1	5.6181	5.4092	5.06064	5.05798	41.1323	1.27627	0.376697	3.38804	0.000703945	0.00424376	sense_intronic	RP11-383C5.5
ENSG00000234139.2	5.29401	5.21934	4.78151	4.86986	34.4955	1.28512	0.396953	3.23745	0.00120602	0.00681964	lincRNA	RP4-550H1.4
ENSG00000234208.1	9.65344	9.63818	8.99086	8.91371	672.839	1.17338	0.10839	10.8255	2.6065e-27	1.02981e-25	sense_intronic	CTA-256D12.11
ENSG00000234261.1	8.71615	8.68939	7.82738	7.98145	346.165	1.40731	0.152937	9.20187	3.51764e-20	1.03946e-18	lincRNA	RP11-146I2.1
ENSG00000234380.1	3.85043	3.73233	3.417	3.45893	12.922	1.71007	0.521379	3.2799	0.00103844	0.00597977	antisense	AP000330.8
ENSG00000234678.1	7.00613	7.05548	6.72153	6.54508	117.262	0.800792	0.242141	3.30713	0.000942569	0.00549146	antisense	RP11-465N4.4
ENSG00000234832.1	8.23025	8.24575	7.38692	7.46345	250.94	1.48919	0.173119	8.60215	7.82384e-18	2.05316e-16	antisense	RP3-322G13.7
ENSG00000234859.1	4.6295	4.44103	3.99312	3.98449	21.2323	2.19142	0.483265	4.53462	5.77061e-06	5.39273e-05	antisense	AC003958.2
ENSG00000234869.1	8.85253	8.96951	8.02945	8.06849	396.558	1.51273	0.14387	10.5146	7.40166e-26	2.76557e-24	antisense	RP3-439F8.1
ENSG00000235049.1	5.33962	5.41829	4.75444	4.85118	37.0157	1.71264	0.397434	4.30925	1.63809e-05	0.000141608	lincRNA	LINC00940
ENSG00000235119.1	4.90079	5.10791	4.59845	4.56458	29.3527	1.35732	0.424753	3.19556	0.00139561	0.00774191	lincRNA	RP11-9M16.2
ENSG00000235123.1	11.2834	11.3829	11.0221	10.9861	2337.51	0.536562	0.0680219	7.88807	3.06896e-15	7.18729e-14	antisense	DSCAM-AS1
ENSG00000235185.1	3.58899	3.68087	3.19422	3.21658	11.703	2.3994	0.538809	4.45315	8.46197e-06	7.69221e-05	antisense	RP5-1056L3.1
ENSG00000235237.1	3.70858	3.77203	3.35918	3.35389	12.4947	1.95448	0.526886	3.7095	0.000207671	0.0014404	antisense	RP1-151B14.6
ENSG00000235280.2	5.68868	5.71434	4.97659	4.94117	45.4733	2.11193	0.376577	5.60823	2.04404e-08	2.65912e-07	antisense	MCF2L-AS1
ENSG00000235664.1	6.32459	6.16477	5.73824	5.77551	67.2077	1.15594	0.30808	3.75208	0.000175371	0.00123892	lincRNA	AC005682.8
ENSG00000235903.3	8.74695	8.71529	8.12738	8.05558	360.978	1.12568	0.14349	7.84501	4.32912e-15	9.97427e-14	antisense	CPB2-AS1
ENSG00000235910.1	7.36407	7.31418	5.56754	5.69798	136.079	3.98104	0.311493	12.7805	2.10668e-37	1.09893e-35	antisense	AP006216.12
ENSG00000236404.4	7.17721	7.33055	6.68204	6.72926	132.923	1.09681	0.23084	4.75137	2.02041e-06	2.02468e-05	antisense	RP11-125B21.2
ENSG00000236830.2	11.3153	11.3116	10.5849	10.6413	2130.3	1.14566	0.0655478	17.4782	2.09943e-68	1.95596e-66	processed_transcript	CBR3-AS1
ENSG00000237128.1	10.2029	10.2241	9.71476	9.72131	1033.86	0.82261	0.0864062	9.52026	1.72738e-21	5.3801e-20	lincRNA	RP11-351M16.3
ENSG00000237200.1	7.0323	7.164	6.62595	6.74137	122.43	0.832948	0.237664	3.50472	0.00045708	0.00289887	sense_intronic	ZBTB40-IT1
ENSG00000237232.3	8.09594	8.13539	7.43046	7.40527	234.145	1.28601	0.175757	7.31694	2.53684e-13	5.25981e-12	lincRNA	ZNF295-AS1
ENSG00000237356.1	8.72344	8.70105	8.01852	8.01036	352.923	1.23292	0.144374	8.53975	1.34518e-17	3.4914e-16	lincRNA	AL163953.3
ENSG00000238043.1	6.07458	6.11194	5.48422	5.62722	60.1429	1.30619	0.324811	4.0214	5.78538e-05	0.000450314	lincRNA	RP11-699L21.2
ENSG00000238117.1	6.87591	6.76748	5.83691	5.94625	95.2451	2.07304	0.282781	7.33089	2.28632e-13	4.75888e-12	antisense	AP004372.1
ENSG00000239653.1	8.73165	8.73138	8.46724	8.32706	385.078	0.578437	0.140386	4.12032	3.78344e-05	0.000305872	antisense	PSMD6-AS2
ENSG00000240875.1	11.6393	11.6364	11.0342	11.0832	2725.93	0.943362	0.0588088	16.0412	6.59035e-58	5.32595e-56	lincRNA	LINC00886
ENSG00000241720.2	9.97566	9.94728	8.97313	8.91301	803.407	1.72171	0.102922	16.7284	8.13921e-63	7.00202e-61	antisense	RP4-735C1.4
ENSG00000242663.1	8.05331	8.07493	7.63927	7.65536	237.708	0.7605	0.16998	4.47406	7.67473e-06	7.02447e-05	antisense	RP11-196G18.21
ENSG00000243069.3	10.1394	10.0825	9.53878	9.52664	947.225	0.965653	0.0917722	10.5223	6.81941e-26	2.55698e-24	processed_transcript	ARHGEF26-AS1
ENSG00000243926.1	6.72224	6.91016	6.01083	6.17802	96.6708	1.5531	0.278749	5.57168	2.52287e-08	3.24446e-07	antisense	TIPARP-AS1
ENSG00000244265.1	6.94828	7.03784	6.10372	5.97738	106.755	2.06115	0.26934	7.65259	1.96978e-14	4.36854e-13	antisense	SIAH2-AS1
ENSG00000244502.2	6.42006	6.3688	5.68006	5.71118	72.4016	1.64813	0.303047	5.43854	5.37194e-08	6.63254e-07	antisense	HDAC11-AS1
ENSG00000246174.3	9.41447	9.44321	8.08495	7.94849	546.418	2.46777	0.134146	18.3962	1.40817e-75	1.51734e-73	antisense	KCTD21-AS1
ENSG00000246214.1	6.3481	6.34266	5.88467	5.81052	71.7284	1.1517	0.296137	3.88908	0.000100624	0.000745942	antisense	RP11-260E18.1
ENSG00000247137.4	9.12096	9.05242	8.75586	8.76691	493.147	0.559249	0.121806	4.59132	4.4046e-06	4.19894e-05	processed_transcript	RP11-727A23.5
ENSG00000247317.3	6.93942	7.02674	6.3405	6.49621	110.056	1.16439	0.252341	4.61435	3.94326e-06	3.79133e-05	lincRNA	RP11-273G15.2
ENSG00000247809.3	8.31622	8.31101	7.76159	7.85674	277.397	0.90393	0.161109	5.61067	2.01544e-08	2.62512e-07	antisense	NR2F2-AS1
ENSG00000248265.1	7.70725	7.64627	7.27513	7.23302	181.721	0.801132	0.193796	4.1339	3.56652e-05	0.000289542	lincRNA	RP11-834C11.3
ENSG00000248266.1	9.57093	9.62585	9.17444	9.2473	692.313	0.650093	0.106068	6.12903	8.84152e-10	1.3386e-08	sense_intronic	RP11-402C9.1
ENSG00000248323.1	2.8694	2.79307	2.597	2.57012	6.78663	1.7034	0.545429	3.12304	0.00178992	0.00959736	lincRNA	LUCAT1
ENSG00000248373.1	8.41507	8.43183	7.64182	7.68646	286.837	1.36902	0.160717	8.51817	1.62099e-17	4.19705e-16	lincRNA	RP11-556I14.1
ENSG00000248954.1	6.13101	6.16029	5.70496	5.47519	62.3586	1.3227	0.327537	4.03833	5.38329e-05	0.000421168	lincRNA	RP11-304F15.4
ENSG00000249007.1	9.47175	9.56916	8.9008	8.84614	622.249	1.09764	0.11476	9.56462	1.12618e-21	3.54905e-20	sense_intronic	RP11-510N19.5
ENSG00000249346.2	8.25124	8.33079	6.91515	6.89308	252.497	2.63561	0.192491	13.6921	1.1322e-42	6.78526e-41	lincRNA	LINC01016
ENSG00000249430.1	5.56736	5.71994	5.27798	5.03385	44.9645	1.28151	0.376896	3.40018	0.000673412	0.00407929	lincRNA	CTD-2231H16.1
ENSG00000249478.1	3.69653	3.62064	3.21299	3.23526	11.8372	2.4231	0.538271	4.50163	6.74348e-06	6.23363e-05	antisense	CTB-49A3.5
ENSG00000249526.1	9.23526	9.31067	7.99494	7.92773	492.356	2.30253	0.137251	16.776	3.65538e-63	3.17023e-61	lincRNA	CTB-35F21.1
ENSG00000249673.2	7.8367	7.89319	7.58798	7.48794	211.723	0.60178	0.181531	3.31502	0.000916362	0.00536073	antisense	NOP14-AS1
ENSG00000249727.1	5.15165	5.19419	4.38578	4.39851	32.2084	2.72567	0.446035	6.1109	9.90713e-10	1.49589e-08	lincRNA	RP11-273B19.2
ENSG00000249859.3	12.7222	12.7602	12.3842	12.3855	6155.01	0.576048	0.0440201	13.086	3.95819e-39	2.13792e-37	processed_transcript	PVT1
ENSG00000249996.1	7.68238	7.77325	7.21754	7.44144	189.947	0.730857	0.201928	3.61939	0.000295298	0.0019725	antisense	RP11-359P5.1
ENSG00000250240.1	7.84272	7.8978	7.04492	7.06018	195.02	1.5531	0.194744	7.97507	1.52296e-15	3.60227e-14	antisense	CTD-2154I11.2
ENSG00000250244.1	5.27205	5.2641	4.36947	4.43182	34.3606	3.0349	0.451411	6.72314	1.77844e-11	3.16455e-10	antisense	CTB-49A3.4
ENSG00000250643.1	8.00411	8.04185	6.82058	6.73585	210.993	2.40333	0.203189	11.8281	2.79505e-32	1.29075e-30	antisense	RP11-93K22.6
ENSG00000251256.1	2.74124	2.77573	2.48791	2.48592	6.45937	1.87324	0.543448	3.44694	0.000566969	0.00350414	lincRNA	RP11-273B19.1
ENSG00000251660.1	5.85631	5.70582	5.29991	5.30882	49.0537	1.25423	0.34935	3.59019	0.000330434	0.00217386	sense_overlapping	AC007036.5
ENSG00000253125.1	5.89349	5.96077	5.16498	4.99766	52.8149	2.28413	0.368423	6.19974	5.65571e-10	8.78198e-09	processed_transcript	RP11-459E5.1
ENSG00000253161.1	7.19385	7.174	6.28021	6.23008	121.269	1.94882	0.248321	7.84799	4.22745e-15	9.76111e-14	lincRNA	RP11-150O12.1
ENSG00000253395.1	5.62448	5.66248	4.94533	5.10363	44.0673	1.70612	0.376542	4.53103	5.86982e-06	5.47824e-05	lincRNA	KB-1460A1.1
ENSG00000253582.1	7.84107	7.65607	6.97657	7.01423	181.288	1.44752	0.207177	6.98687	2.81086e-12	5.33064e-11	antisense	RP11-649G15.2
ENSG00000253671.1	8.64862	8.54119	8.1566	8.24175	345.213	0.697013	0.147957	4.71091	2.46613e-06	2.43701e-05	processed_transcript	RP11-806O11.1
ENSG00000253917.3	9.12899	9.18089	8.7918	8.92021	521.025	0.504736	0.123228	4.09593	4.20469e-05	0.000337498	processed_transcript	AC226119.5
ENSG00000253944.1	9.89881	9.80306	9.43114	9.52261	827.852	0.625531	0.102039	6.13033	8.76986e-10	1.32982e-08	antisense	RP11-156K13.1
ENSG00000253978.1	4.07197	4.06277	3.51672	3.56349	15.5414	2.59325	0.524455	4.94465	7.62823e-07	8.11308e-06	antisense	CTB-178M22.2
ENSG00000254024.1	11.5061	11.5459	10.8935	10.9303	2506.15	1.00172	0.0614041	16.3136	7.90499e-60	6.56237e-58	antisense	KB-1562D12.1
ENSG00000254140.1	5.19477	5.22593	4.35359	4.34377	33.1163	3.09906	0.457976	6.76686	1.31612e-11	2.3796e-10	lincRNA	RP11-731F5.1
ENSG00000254180.1	8.81918	8.81614	8.32874	8.32445	393.85	0.856058	0.134607	6.35967	2.02184e-10	3.2803e-09	processed_transcript	AB015752.3
ENSG00000254231.1	7.0696	7.23144	6.74739	6.80928	128.126	0.744363	0.232381	3.2032	0.00135909	0.0075708	processed_transcript	CTD-2284J15.1
ENSG00000254290.1	6.55376	6.58849	5.90448	5.7347	81.3762	1.7061	0.295373	5.77608	7.64621e-09	1.05043e-07	lincRNA	RP11-150O12.3
ENSG00000254632.1	6.85923	6.96825	5.97179	5.97228	101.25	2.07168	0.273614	7.57156	3.6878e-14	8.01214e-13	antisense	RP11-21L23.4
ENSG00000254682.1	8.1278	8.13841	7.62879	7.71663	247.081	0.834467	0.169114	4.93433	8.04247e-07	8.53238e-06	antisense	RP11-660L16.2
ENSG00000254698.1	9.73313	9.67348	9.31596	9.37065	749.405	0.604598	0.101718	5.94388	2.78346e-09	4.04531e-08	sense_overlapping	RP11-659G9.3
ENSG00000255100.1	6.2771	6.2158	5.6327	5.56725	65.8546	1.56159	0.314143	4.97094	6.66284e-07	7.12897e-06	antisense	RP11-21L23.3
ENSG00000255242.1	7.84558	7.76576	7.30869	7.43738	198.435	0.804659	0.190328	4.22776	2.36033e-05	0.000198025	processed_transcript	C14orf169
ENSG00000255274.4	4.39996	4.41875	3.90347	3.87159	19.4438	2.18353	0.490479	4.45184	8.51357e-06	7.73253e-05	antisense	TMPRSS4-AS1
ENSG00000256571.1	6.38036	6.48703	5.56342	5.70097	74.0096	1.88746	0.311457	6.06008	1.36058e-09	2.03419e-08	sense_intronic	RP11-274J7.2
ENSG00000256884.1	6.31327	6.39334	5.26572	5.26635	69.8087	2.80191	0.342818	8.17317	3.00399e-16	7.36668e-15	antisense	RP11-64B16.3
ENSG00000256982.1	7.17301	7.14591	6.65135	6.65953	125.162	1.01989	0.230257	4.42934	9.45202e-06	8.50164e-05	lincRNA	CTD-2555A7.2
ENSG00000257083.1	7.68659	7.63482	7.3049	7.29008	182.084	0.687388	0.192274	3.57504	0.000350169	0.00229308	lincRNA	RP11-123O10.3
ENSG00000257683.1	4.81785	4.89747	4.11507	4.24861	26.2345	2.48923	0.472133	5.2723	1.34725e-07	1.58367e-06	lincRNA	RP11-110L15.2
ENSG00000258249.1	4.87845	4.99187	4.45368	4.49957	27.7494	1.52499	0.431301	3.53579	0.000406565	0.00261794	lincRNA	RP11-497G19.3
ENSG00000258302.1	7.9547	7.90553	7.58861	7.51719	218.721	0.695659	0.177898	3.91043	9.21306e-05	0.000687642	antisense	RP11-981P6.1
ENSG00000258337.1	9.70792	9.69994	9.12952	9.07427	711.457	1.01519	0.103978	9.76348	1.61523e-22	5.29354e-21	sense_intronic	RP11-115H15.2
ENSG00000258412.1	5.18815	4.96984	4.46953	4.63499	30.5938	1.67316	0.433694	3.85792	0.000114355	0.000841301	sense_intronic	RP11-404P21.5
ENSG00000258520.1	4.8615	4.92397	4.15431	4.21754	26.8203	2.66022	0.469256	5.66902	1.43618e-08	1.90791e-07	lincRNA	RP11-363J20.2
ENSG00000258525.1	6.96009	7.01025	6.58303	6.57552	113.168	0.833716	0.239521	3.48077	0.000499977	0.00314105	antisense	RP11-829H16.3
ENSG00000258559.2	8.94328	8.93104	8.52994	8.48848	433.718	0.740208	0.128669	5.75281	8.77719e-09	1.19427e-07	sense_overlapping	AC005519.4
ENSG00000258603.1	7.86737	7.86816	5.97301	6.03097	193.87	4.03164	0.268496	15.0157	5.79776e-51	4.16482e-49	antisense	RP3-414A15.10
ENSG00000258682.1	8.5307	8.42017	7.88213	7.77577	302.694	1.15699	0.160528	7.20744	5.70119e-13	1.16064e-11	sense_overlapping	CTD-2002H8.2
ENSG00000258731.1	4.82331	4.71461	4.21361	4.18076	24.6666	2.11813	0.460784	4.5968	4.29019e-06	4.09353e-05	antisense	RP11-547D23.1
ENSG00000258820.1	4.97324	5.14216	4.55918	4.50545	30.098	1.71385	0.427168	4.01212	6.01765e-05	0.000466352	antisense	RP11-293M10.2
ENSG00000258892.1	10.0957	10.0362	9.79227	9.68079	971.439	0.546687	0.0947725	5.76841	8.00212e-09	1.09509e-07	processed_transcript	RP11-193F5.1
ENSG00000258982.1	10.1666	10.1669	9.78443	9.89277	1041.74	0.540626	0.0902196	5.99233	2.06854e-09	3.04781e-08	antisense	RP11-638I2.4
ENSG00000259065.1	6.92281	6.97526	6.52825	6.31325	108.268	1.08532	0.256689	4.22816	2.35615e-05	0.000197752	antisense	RP5-1021I20.1
ENSG00000259146.2	8.49697	8.45777	8.05226	8.0196	314.634	0.784317	0.149819	5.23509	1.64901e-07	1.92039e-06	antisense	RP1-261D10.2
ENSG00000259330.1	5.88071	6.01108	5.37903	5.56675	55.0895	1.16515	0.340518	3.4217	0.000622312	0.00380649	antisense	LINC00984
ENSG00000259459.1	9.22078	9.25732	7.41796	7.59162	481.538	3.11349	0.155347	20.0422	2.36019e-89	3.12761e-87	lincRNA	RP11-321G12.1
ENSG00000259687.1	6.00746	6.068	5.15361	5.25899	56.7294	2.18	0.351416	6.20346	5.52364e-10	8.59568e-09	lincRNA	RP11-293M10.5
ENSG00000259716.1	6.98027	6.98868	6.20567	6.16679	106.949	1.70453	0.257245	6.6261	3.4467e-11	5.97363e-10	antisense	RP5-977B1.11
ENSG00000259977.1	8.05518	8.14612	6.31822	6.27979	225.262	3.68973	0.237377	15.5438	1.75365e-54	1.34583e-52	lincRNA	AL121578.2
ENSG00000260006.1	7.85381	7.89414	7.50685	7.47895	210.154	0.705304	0.180071	3.91682	8.97259e-05	0.000671214	lincRNA	RP11-469M7.1
ENSG00000260032.1	10.0508	10.0769	9.37945	9.38288	899.703	1.14132	0.093355	12.2256	2.26927e-34	1.08311e-32	lincRNA	LINC00657
ENSG00000260177.1	9.09947	9.12892	8.38839	8.3331	461.922	1.30416	0.128818	10.1241	4.32103e-24	1.49737e-22	lincRNA	RP4-536B24.3
ENSG00000260401.1	9.08114	9.17504	7.50405	7.67053	445.389	2.7488	0.15578	17.6454	1.10405e-69	1.07068e-67	sense_overlapping	RP11-800A3.4
ENSG00000260417.1	8.55143	8.63645	8.32425	8.20035	350.477	0.578379	0.147467	3.92208	8.77878e-05	0.000657869	lincRNA	CTD-2542L18.1
ENSG00000260566.2	9.13426	9.22536	7.68996	7.80142	461.182	2.5407	0.147299	17.2486	1.14547e-66	1.03553e-64	3prime_overlapping_ncrna	RP11-20G6.3
ENSG00000260641.1	4.935	4.96497	4.33866	4.34937	27.7589	2.12635	0.44449	4.78379	1.72021e-06	1.74019e-05	antisense	RP11-1299A16.3
ENSG00000260710.1	7.37706	7.43274	6.68928	6.61464	143.004	1.50145	0.224418	6.69039	2.22576e-11	3.92775e-10	lincRNA	RP11-616M22.7
ENSG00000260879.1	7.11174	7.08657	6.47135	6.37427	117.112	1.39785	0.243774	5.7342	9.79717e-09	1.32629e-07	antisense	RP11-483I13.5
ENSG00000260910.1	3.78426	3.82911	3.30733	3.30358	13.1163	2.7731	0.538897	5.14588	2.66267e-07	3.0121e-06	lincRNA	LINC00565
ENSG00000261026.1	5.9388	6.01139	5.04467	5.10435	54.4048	2.45677	0.364659	6.73717	1.61503e-11	2.88824e-10	sense_overlapping	CTD-3247F14.2
ENSG00000261068.1	5.32673	5.44054	4.85398	4.76302	37.1941	1.71035	0.39724	4.30559	1.66542e-05	0.000143737	lincRNA	RP11-7K24.3
ENSG00000261101.1	5.0008	4.87448	4.28611	4.50539	27.7379	1.76925	0.453751	3.89916	9.65277e-05	0.000717317	sense_overlapping	RP4-545K15.5
ENSG00000261136.1	6.89089	6.95493	6.30456	6.47118	106.088	1.10839	0.255654	4.33553	1.45409e-05	0.000126883	antisense	RP11-37C7.3
ENSG00000261226.1	8.28698	8.24892	7.31724	7.23177	251.881	1.83778	0.177662	10.3442	4.44389e-25	1.60424e-23	sense_intronic	RP11-830F9.7
ENSG00000261526.1	7.21254	7.24833	6.64937	6.6341	129.609	1.18658	0.228756	5.1871	2.13596e-07	2.44478e-06	lincRNA	CTB-31O20.2
ENSG00000261550.1	7.24125	7.20016	6.59113	6.6684	128.727	1.19099	0.230727	5.16191	2.44442e-07	2.77995e-06	antisense	RP11-467J12.4
ENSG00000261578.1	8.90164	9.01812	7.69861	7.64227	398.194	2.30228	0.1532	15.028	4.81498e-51	3.47053e-49	sense_overlapping	RP11-21L23.2
ENSG00000261606.1	5.73475	5.99222	5.08505	5.04905	51.0887	2.17533	0.372236	5.84396	5.09743e-09	7.169e-08	processed_transcript	RP11-414J4.2
ENSG00000261632.1	5.32629	5.39434	4.73609	4.50949	36.5301	1.77447	0.522021	3.39924	0.000675736	0.00409104	antisense	RP11-390D11.1
ENSG00000261664.1	9.06851	9.02841	8.45752	8.49228	454.612	0.991347	0.127498	7.77537	7.5226e-15	1.69656e-13	antisense	RP11-275F13.1
ENSG00000261863.1	4.35622	4.28344	3.67652	3.69772	18.442	3.02827	0.521275	5.80936	6.27129e-09	8.68818e-08	lincRNA	RP11-141J13.5
ENSG00000262188.1	3.37405	3.2723	2.9953	2.99161	9.43979	1.92318	0.54186	3.54921	0.000386386	0.00250031	lincRNA	RP11-353N14.4
ENSG00000263069.1	10.5411	10.538	10.0485	10.0016	1290.63	0.849485	0.0791125	10.7377	6.77257e-27	2.65124e-25	antisense	CTD-2047H16.4
ENSG00000263105.1	5.54754	5.69057	5.07558	5.21533	44.0898	1.27581	0.369204	3.45558	0.00054911	0.00340957	lincRNA	RP11-95P2.3
ENSG00000263350.1	7.03289	6.91428	6.66542	6.52759	113.213	0.77294	0.245387	3.14989	0.00163333	0.00888249	lincRNA	RP11-13N13.2
ENSG00000263470.1	4.68338	4.9481	4.13897	4.1774	25.8391	2.45951	0.472729	5.20278	1.96326e-07	2.26465e-06	lincRNA	RP11-160O5.1
ENSG00000263718.2	5.7646	5.93385	5.24745	5.12712	50.6384	1.75323	0.359975	4.87041	1.11366e-06	1.16015e-05	lincRNA	RP11-285E9.6
ENSG00000263826.1	7.13499	7.1265	6.63258	6.84058	125.745	0.776317	0.236891	3.2771	0.00104878	0.00602629	antisense	RP11-573D15.9
ENSG00000263895.1	8.31594	8.2318	7.93357	7.81526	276.256	0.716901	0.163608	4.38181	1.17695e-05	0.000104322	sense_intronic	RP11-110H1.9
ENSG00000264044.1	2.92759	3.01585	2.70195	2.67324	7.49476	1.81626	0.545761	3.32793	0.000874937	0.00513812	antisense	RP11-192H23.7
ENSG00000264269.1	6.91581	6.85798	5.97331	6.023	99.5552	1.95152	0.27136	7.19164	6.40194e-13	1.29465e-11	antisense	RP11-15F12.1
ENSG00000264443.1	4.7167	4.62597	4.07019	4.25876	23.2158	1.8061	0.473821	3.81178	0.000137972	0.000997506	lincRNA	RP4-594I10.3
ENSG00000264589.1	8.04748	8.10198	6.98065	7.0096	219.683	2.04528	0.19192	10.6569	1.61908e-26	6.28056e-25	antisense	MAPT-AS1
ENSG00000264666.1	7.52866	7.48685	7.11552	7.04221	161.514	0.826245	0.204946	4.03152	5.54171e-05	0.000432294	antisense	RP11-524F11.2
ENSG00000264860.1	7.06348	7.10529	5.99836	6.07587	112.958	2.2624	0.264864	8.54174	1.32216e-17	3.43586e-16	processed_transcript	RP11-143K11.5
ENSG00000265943.1	7.89473	7.81181	7.40683	7.52943	207.222	0.71192	0.185966	3.82823	0.000129066	0.000939159	antisense	RP11-739L10.1
ENSG00000266036.1	6.44047	6.47449	5.58325	5.66417	74.9055	1.97605	0.307447	6.42731	1.29883e-10	2.14644e-09	antisense	MIR3615
ENSG00000266313.1	6.69539	6.67633	5.68181	5.85635	87.0122	2.08005	0.296022	7.0267	2.11483e-12	4.05389e-11	lincRNA	RP11-173M1.4
ENSG00000266877.1	10.1734	10.1331	9.06819	9.08787	912.473	1.81104	0.0973247	18.6082	2.75626e-77	3.04688e-75	lincRNA	RP1-41C23.1
ENSG00000266922.1	8.08135	8.05635	6.70899	6.90931	217.746	2.40314	0.205807	11.6766	1.67794e-31	7.61677e-30	sense_intronic	CTC-499B15.6
ENSG00000267092.1	4.35277	4.25283	3.67654	3.72299	18.2139	2.81318	0.517127	5.44002	5.32755e-08	6.58918e-07	antisense	CTB-25B13.9
ENSG00000267660.1	4.29843	4.13785	3.81802	3.78662	17.2024	1.7629	0.495809	3.55561	0.000377108	0.00244751	lincRNA	CTC-479C5.17
ENSG00000267690.1	2.80359	2.83824	2.55193	2.57523	6.73078	1.70146	0.545398	3.11968	0.0018105	0.00969799	antisense	LDLRAD4-AS1
ENSG00000267701.1	7.03106	7.08921	6.24005	6.01006	111.894	1.97608	0.268376	7.36313	1.79647e-13	3.7687e-12	sense_intronic	RP11-28F1.2
ENSG00000267868.1	5.05798	4.91307	4.49784	4.48444	28.6036	1.64535	0.429768	3.82846	0.000128948	0.000938626	lincRNA	RP11-120K24.3
ENSG00000268913.1	8.55793	8.62309	6.94823	6.94508	309.938	3.10413	0.186074	16.6823	1.76445e-62	1.51183e-60	lincRNA	AC026806.2
ENSG00000269189.1	6.76847	6.84173	6.10194	5.99232	95.1944	1.65581	0.272929	6.06683	1.30457e-09	1.95319e-08	sense_intronic	RP11-573N10.1
ENSG00000269303.1	4.02093	3.7763	3.51717	3.5107	14.0178	1.80628	0.519054	3.47995	0.00050151	0.00314883	antisense	CTD-2527I21.7
ENSG00000269356.1	4.88012	4.84166	4.21254	4.35616	26.2161	2.01896	0.456637	4.42138	9.80731e-06	8.80069e-05	sense_intronic	RP11-120K24.4
ENSG00000269376.1	5.74691	5.75848	4.90343	4.96607	46.9815	2.33514	0.380014	6.14488	8.00236e-10	1.223e-08	sense_intronic	RP11-120K24.5
ENSG00000269420.1	5.85178	5.88416	4.82352	4.80982	50.932	3.14741	0.400992	7.84907	4.19148e-15	9.68854e-14	antisense	CTD-2265M8.2
ENSG00000269619.1	4.28703	4.31653	3.87708	3.95631	18.1694	1.54703	0.484954	3.19006	0.00142241	0.00787828	lincRNA	CTD-3023J11.2
ENSG00000269967.1	10.1872	10.2089	9.40954	9.38834	969.831	1.33504	0.091224	14.6348	1.68547e-48	1.1308e-46	lincRNA	RP11-84A19.4
ENSG00000270108.1	6.75586	6.55564	6.35571	6.03254	90.2831	0.967841	0.294868	3.28229	0.00102969	0.005939	sense_intronic	RP11-73M18.6
ENSG00000270344.1	8.6348	8.55983	8.06646	8.07688	336.022	0.930797	0.147188	6.32388	2.55072e-10	4.08862e-09	antisense	RP11-734K2.4
ENSG00000271009.2	6.82485	6.90724	6.40228	6.27622	102.146	1.10811	0.257772	4.2988	1.71727e-05	0.000147913	lincRNA	RP11-346C20.3
ENSG00000271020.1	5.60488	5.47615	4.91873	4.86493	41.067	1.88698	0.386536	4.88179	1.0513e-06	1.0984e-05	lincRNA	RP11-10C24.1
ENSG00000271090.1	5.25872	5.25324	4.51917	4.43945	33.981	2.60737	0.435503	5.98704	2.1369e-09	3.14203e-08	lincRNA	AC012531.23
ENSG00000271324.1	4.94831	4.95818	4.24799	4.45542	27.9189	2.00857	0.456898	4.39611	1.10208e-05	9.80518e-05	lincRNA	RP11-10C24.2
ENSG00000271643.1	5.55375	5.53961	4.85825	4.89901	41.1163	1.94931	0.385794	5.05272	4.35569e-07	4.78604e-06	lincRNA	RP11-10C24.3
ENSG00000271843.1	8.21797	8.25057	7.9123	7.99691	276.585	0.498126	0.159175	3.12942	0.00175152	0.009432	lincRNA	RP11-245J9.5
ENSG00000271880.1	7.78393	7.76213	7.38926	7.47819	197.972	0.63041	0.185982	3.38962	0.00069989	0.00422289	processed_transcript	RP11-96C23.5
ENSG00000271966.1	7.6675	7.59694	7.12745	7.17178	174.089	0.921367	0.198889	4.63256	3.61168e-06	3.4914e-05	lincRNA	RP11-7F18.2
ENSG00000272360.1	2.61653	2.71152	2.41871	2.417	6.11644	1.79535	0.541904	3.31304	0.000922864	0.00539433	lincRNA	RP11-359I18.5
ENSG00000272472.1	6.41546	6.36766	5.48756	5.41739	71.4661	2.3122	0.322364	7.17264	7.3566e-13	1.47929e-11	lincRNA	RP11-95G17.2
ENSG00000272508.1	7.28217	7.05361	6.51279	6.68446	125.378	1.15066	0.248416	4.63198	3.62183e-06	3.49962e-05	processed_transcript	RP11-96C23.14
ENSG00000272610.1	11.3351	11.3208	10.905	10.9442	2284.77	0.657991	0.0619902	10.6144	2.55338e-26	9.79789e-25	sense_intronic	MAGI1-IT1
ENSG00000272695.1	5.33512	5.11593	4.26732	4.25886	33.9021	3.68085	0.485028	7.58893	3.22551e-14	7.02924e-13	lincRNA	GAS6-AS2
ENSG00000272980.1	10.2598	10.2846	9.93023	9.96927	1121.74	0.532525	0.0833539	6.38872	1.67282e-10	2.7244e-09	processed_transcript	RP11-517H2.6
ENSG00000273046.1	9.30439	9.31792	8.91573	8.89585	564.753	0.689431	0.113322	6.0838	1.17366e-09	1.76339e-08	processed_transcript	RP11-834C11.14
ENSG00000273489.1	5.24669	5.16027	4.55715	4.45775	32.8271	2.29364	0.430676	5.32567	1.0058e-07	1.20168e-06	antisense	RP11-180C16.1

## Sheet: GROseq down
	MCF7_shCtrl_E2_rep1	MCF7_shCtrl_E2_rep2	MCF7_shCtrl_Veh_rep1	MCF7_shCtrl_Veh_rep2	baseMean	log2FoldChange	lfcSE	stat	pvalue	padj	transcript_type	transcript_name
ENSG00000177337.3	6.19768	6.10068	6.72958	6.69198	91.8494	-1.20601	0.265443	-4.54339	5.5358e-06	5.20292e-05	antisense	DLGAP1-AS1
ENSG00000182165.13	7.81124	7.86139	8.3611	8.17493	274.19	-0.779937	0.167443	-4.65793	3.19412e-06	3.10321e-05	lincRNA	TP53TG1
ENSG00000182310.8	9.18191	9.19253	9.85312	9.7887	767.922	-1.0654	0.100145	-10.6386	1.96987e-26	7.58613e-25	processed_transcript	LINC00085
ENSG00000186615.6	7.60432	7.57611	8.14545	7.93994	233.855	-0.83085	0.180664	-4.59886	4.24799e-06	4.06052e-05	antisense	KTN1-AS1
ENSG00000197308.4	6.59702	6.58682	7.27972	7.06879	126.09	-1.17949	0.237192	-4.97272	6.60189e-07	7.07085e-06	lincRNA	GATA3-AS1
ENSG00000203635.2	7.7249	7.57178	8.06164	8.01238	235.57	-0.697514	0.175984	-3.96351	7.38561e-05	0.000561955	lincRNA	AC144450.2
ENSG00000213468.3	8.10346	8.17413	8.52197	8.47521	325.881	-0.635846	0.147012	-4.32514	1.52434e-05	0.000132472	lincRNA	RP11-453F18__B.1
ENSG00000214293.4	8.38404	8.29749	8.77639	8.62767	375.616	-0.628425	0.144632	-4.34498	1.39287e-05	0.00012204	lincRNA	RSBN1L-AS1
ENSG00000222041.6	6.65738	6.51467	6.98993	7.06471	116.324	-0.888607	0.24045	-3.69559	0.000219374	0.00151125	lincRNA	LINC00152
ENSG00000223701.3	6.38085	6.42171	6.78579	6.97319	104.688	-1.00563	0.253445	-3.96785	7.25243e-05	0.000552807	antisense	RAET1E-AS1
ENSG00000223808.1	7.87341	7.85461	8.26955	8.36779	281.855	-0.815497	0.158372	-5.14926	2.61517e-07	2.95993e-06	lincRNA	RP11-428L9.2
ENSG00000224738.1	10.0998	10.0561	10.424	10.4063	1234.21	-0.554757	0.0796612	-6.96395	3.30855e-12	6.2412e-11	antisense	AC099850.1
ENSG00000224812.2	7.88103	7.86832	8.14811	8.21724	265.233	-0.554722	0.160593	-3.45422	0.000551889	0.00342383	antisense	TMEM72-AS1
ENSG00000225855.2	8.00525	7.92866	8.27654	8.2712	282.549	-0.544559	0.156404	-3.48176	0.000498139	0.00313135	antisense	RUSC1-AS1
ENSG00000228323.2	7.3443	7.30246	7.62001	7.67332	182.446	-0.607643	0.190758	-3.18541	0.0014455	0.00798959	antisense	AC008753.6
ENSG00000228950.1	6.91247	6.81832	7.21359	7.38417	140.595	-0.851525	0.223296	-3.81343	0.000137053	0.000991198	lincRNA	AC023137.2
ENSG00000229989.3	8.83972	8.95048	10.47	10.4237	1098.12	-2.6277	0.0971839	-27.0385	5.21978e-161	1.61397e-158	lincRNA	MIR181A1HG
ENSG00000231131.2	3.75871	3.8783	4.45982	4.28971	19.812	-2.27251	0.49277	-4.6117	3.99398e-06	3.83318e-05	lincRNA	RP11-346D6.6
ENSG00000232386.5	8.74774	8.78737	9.15178	9.1824	512.373	-0.684001	0.118253	-5.78419	7.28604e-09	1.00483e-07	lincRNA	RP11-66B24.2
ENSG00000232442.1	7.96789	8.11347	8.32191	8.38949	298.856	-0.559444	0.158213	-3.53603	0.000406191	0.00261683	antisense	CTD-3184A7.4
ENSG00000233108.1	4.24934	4.30137	4.95995	4.71519	26.7358	-1.95488	0.445462	-4.38843	1.14169e-05	0.000101323	antisense	AC006042.7
ENSG00000233237.2	9.11677	9.17989	10.4132	10.3522	1059.43	-2.07388	0.0927886	-22.3506	1.19082e-110	2.17146e-108	lincRNA	LINC00472
ENSG00000233621.1	6.98051	6.96673	7.72833	7.75425	180.366	-1.46604	0.196439	-7.46309	8.45158e-14	1.80134e-12	antisense	RP11-422J8.1
ENSG00000233806.3	10.1871	10.1769	10.5019	10.4706	1307.58	-0.501058	0.0770068	-6.50667	7.68328e-11	1.29379e-09	antisense	AC131097.3
ENSG00000233854.1	8.04407	8.1014	8.37297	8.32408	299.958	-0.490895	0.151904	-3.23161	0.00123096	0.00693856	antisense	POU6F2-AS2
ENSG00000234752.1	10.0699	10.0609	10.4252	10.3776	1222.97	-0.554428	0.0799911	-6.93113	4.1749e-12	7.8408e-11	lincRNA	RP11-428L9.1
ENSG00000234753.1	8.61675	8.62075	8.92966	9.00366	451.684	-0.600339	0.126102	-4.76072	1.92899e-06	1.93762e-05	antisense	RP11-328M4.2
ENSG00000235939.1	5.53693	5.49495	5.9294	6.06193	57.2795	-1.18257	0.323674	-3.65359	0.000258604	0.00175041	antisense	RP11-123B3.2
ENSG00000237126.4	6.26218	6.36206	6.91392	6.96762	106.523	-1.31867	0.249907	-5.27664	1.31573e-07	1.54918e-06	antisense	AC073254.1
ENSG00000237187.4	5.61177	5.39304	6.01677	5.86778	55.7631	-1.05585	0.338926	-3.11529	0.00183762	0.00982105	processed_transcript	NR2F1-AS1
ENSG00000237527.1	5.25336	5.22222	5.71343	5.66333	46.6306	-1.1882	0.348053	-3.41386	0.000640496	0.00390428	lincRNA	AF241725.6
ENSG00000240093.1	5.17155	5.09583	5.72219	5.66203	46.3012	-1.4893	0.355192	-4.19295	2.75356e-05	0.000228322	antisense	AC093627.12
ENSG00000240541.2	6.51171	6.57995	7.14698	7.18933	124.339	-1.26329	0.231514	-5.45666	4.85183e-08	6.03931e-07	antisense	TM4SF1-AS1
ENSG00000241990.1	7.15351	7.29088	7.708	7.65849	181.841	-0.869555	0.196351	-4.42858	9.48536e-06	8.52104e-05	antisense	RP6-109B7.3
ENSG00000243155.1	9.50266	9.55157	9.80743	9.89905	839.265	-0.546959	0.0979232	-5.58559	2.32906e-08	3.0079e-07	antisense	RP11-46A10.5
ENSG00000243350.1	5.93362	6.03437	6.73869	6.57591	87.814	-1.48625	0.278164	-5.34306	9.13924e-08	1.09851e-06	lincRNA	RP11-379F12.3
ENSG00000244468.1	8.97643	9.00685	9.89211	9.85686	768.363	-1.48989	0.100952	-14.7584	2.71561e-49	1.85697e-47	antisense	RP11-206M11.7
ENSG00000245937.3	9.94331	9.94793	10.2968	10.2434	1119.98	-0.537034	0.0833181	-6.44559	1.15151e-10	1.90592e-09	lincRNA	CTC-228N24.3
ENSG00000246523.3	7.41364	7.29772	7.65266	7.78009	190.133	-0.671286	0.193731	-3.46505	0.000530135	0.00330328	lincRNA	RP11-736K20.6
ENSG00000246985.3	8.53805	8.58351	9.17788	9.02638	476.289	-0.933972	0.130413	-7.16164	7.97159e-13	1.59394e-11	processed_transcript	SOCS2-AS1
ENSG00000247011.2	8.79449	8.90721	9.17076	9.23063	531.182	-0.597135	0.121141	-4.92924	8.25501e-07	8.74047e-06	lincRNA	RP11-700H6.1
ENSG00000247287.2	7.21308	7.19005	7.69488	7.69735	181.989	-0.933926	0.191428	-4.87875	1.06762e-06	1.1146e-05	processed_transcript	RP11-902B17.1
ENSG00000248367.1	6.82602	6.95561	7.3676	7.35405	145.413	-0.918926	0.215954	-4.2552	2.08864e-05	0.00017669	antisense	CTB-129O4.1
ENSG00000249684.1	7.73285	7.66609	8.03691	8.05311	238.928	-0.625594	0.168757	-3.70707	0.000209675	0.00145099	antisense	RP11-423H2.3
ENSG00000249885.1	6.26461	6.21331	7.51354	7.54839	153.131	-2.63891	0.232544	-11.348	7.58588e-30	3.24989e-28	sense_intronic	ARHGEF38-IT1
ENSG00000250101.1	9.0263	9.05922	9.32082	9.37702	594.646	-0.520191	0.110828	-4.69369	2.68314e-06	2.63308e-05	antisense	RP11-1252I4.2
ENSG00000250328.1	4.74448	4.75693	5.37179	5.1131	34.8615	-1.47156	0.401133	-3.6685	0.000243975	0.00165983	antisense	CTC-210G5.1
ENSG00000250522.1	5.94378	5.98503	6.44004	6.3534	75.6649	-0.9783	0.284997	-3.43267	0.000597679	0.00367266	antisense	AC004066.3
ENSG00000250608.1	7.41604	7.41747	7.80308	7.76828	198.664	-0.687167	0.182859	-3.75791	0.000171339	0.00121446	processed_transcript	RP11-933H2.4
ENSG00000253361.1	6.32437	6.31795	6.85687	6.80707	100.449	-1.0788	0.251855	-4.2834	1.84059e-05	0.000157643	lincRNA	RP11-675F6.3
ENSG00000253586.1	3.81945	3.95935	4.38992	4.39721	19.8625	-1.98789	0.484663	-4.1016	4.10306e-05	0.000329713	sense_intronic	RP11-723D22.2
ENSG00000254100.1	4.78297	4.93611	5.47567	5.44573	39.7432	-1.71954	0.384322	-4.47423	7.66867e-06	7.02193e-05	lincRNA	RP11-675F6.4
ENSG00000254248.1	4.37721	4.39657	4.99295	4.96624	28.9568	-1.98929	0.427451	-4.65385	3.25794e-06	3.15927e-05	antisense	RP11-320N21.2
ENSG00000254286.1	8.94888	9.02127	9.33062	9.25157	571.639	-0.520765	0.115523	-4.5079	6.54731e-06	6.06806e-05	antisense	RP11-89K10.1
ENSG00000254973.1	7.09895	7.20293	7.4876	7.47727	162.687	-0.635001	0.202693	-3.13283	0.00173131	0.00934183	lincRNA	RP11-429J17.7
ENSG00000255571.2	8.03922	7.91422	8.40218	8.51376	308.914	-0.848479	0.157431	-5.38953	7.06432e-08	8.62226e-07	lincRNA	LINC00925
ENSG00000256514.1	7.18639	7.25676	7.87556	7.79868	196.608	-1.15599	0.188564	-6.1305	8.76052e-10	1.32934e-08	processed_transcript	AP003419.11
ENSG00000257002.1	5.64931	5.5892	6.16485	6.22447	64.697	-1.37066	0.308606	-4.44144	8.93568e-06	8.08494e-05	antisense	AP000438.2
ENSG00000257337.2	10.6251	10.6819	10.9198	11.0066	1818.27	-0.508784	0.0728753	-6.98157	2.91892e-12	5.53065e-11	antisense	RP11-983P16.4
ENSG00000257671.1	5.22757	5.41643	6.12939	6.14766	61.6658	-2.03307	0.333595	-6.09444	1.09821e-09	1.65351e-08	antisense	RP3-416H24.1
ENSG00000257809.1	7.1905	7.33174	7.70788	7.51873	177.929	-0.668546	0.20534	-3.25581	0.00113071	0.00643814	antisense	RP11-603J24.14
ENSG00000258048.1	8.78451	8.65697	9.08881	9.10573	491.222	-0.637224	0.125541	-5.07581	3.85846e-07	4.26327e-06	lincRNA	RP11-530C5.1
ENSG00000258216.1	6.57138	6.65377	7.11163	7.18642	124.329	-1.08565	0.23128	-4.69411	2.67776e-06	2.6303e-05	lincRNA	RP11-654D12.2
ENSG00000258334.1	6.16281	5.98931	6.47371	6.53634	81.5867	-0.930711	0.282267	-3.29728	0.000976277	0.00566002	antisense	RP11-161H23.9
ENSG00000258457.1	5.83094	5.7734	6.2299	6.18822	66.7916	-0.947049	0.299469	-3.16242	0.00156462	0.00855925	antisense	RP11-298I3.4
ENSG00000258551.1	4.15104	4.31851	4.92869	4.95017	28.462	-2.45923	0.453772	-5.41954	5.97528e-08	7.35193e-07	lincRNA	RP11-661P17.1
ENSG00000259291.1	7.93759	7.9055	8.33166	8.28771	284.023	-0.69269	0.155501	-4.45457	8.4061e-06	7.64794e-05	antisense	RP11-617F23.1
ENSG00000259527.1	6.83413	6.8904	7.73097	7.71143	176.407	-1.65552	0.200993	-8.23672	1.76989e-16	4.36538e-15	lincRNA	LINC00052
ENSG00000259711.1	8.97868	8.90548	9.2972	9.31031	568.34	-0.610971	0.11385	-5.36645	8.03027e-08	9.73995e-07	lincRNA	CTD-3032H12.2
ENSG00000259986.1	5.69757	5.63059	6.15254	6.07766	62.2671	-1.07505	0.310562	-3.46162	0.000536932	0.00334075	antisense	RP11-382A20.4
ENSG00000260228.1	5.16363	5.13247	6.13992	6.14794	61.8018	-2.5851	0.340404	-7.59422	3.09647e-14	6.76185e-13	antisense	RP11-483P21.2
ENSG00000260285.1	7.48746	7.46954	7.80803	7.84036	205.099	-0.640602	0.180074	-3.55745	0.000374479	0.00243508	antisense	RP11-600F24.7
ENSG00000260430.1	7.66048	7.67112	7.99441	8.10532	237.808	-0.70253	0.171195	-4.10368	4.06632e-05	0.000326884	lincRNA	RP11-626G11.4
ENSG00000260958.2	7.22281	7.23358	7.4919	7.68503	174.317	-0.690447	0.202511	-3.40943	0.000650986	0.00395805	lincRNA	RP11-488I20.8
ENSG00000261335.1	5.4254	5.22586	5.83916	5.83506	51.3052	-1.27605	0.347266	-3.67455	0.000238266	0.00162513	antisense	RP11-318A15.2
ENSG00000261597.1	7.92222	7.97566	8.23617	8.26473	278.386	-0.540774	0.156712	-3.45075	0.000559028	0.00346105	sense_overlapping	RP11-353B9.1
ENSG00000263494.1	8.05016	7.99754	8.32803	8.32402	293.224	-0.535699	0.152798	-3.50592	0.000455031	0.00288845	lincRNA	AC004702.2
ENSG00000264895.1	6.62277	6.70749	6.99431	7.07071	118.419	-0.746766	0.234312	-3.18706	0.00143726	0.00795206	sense_intronic	RP11-421E14.2
ENSG00000265479.1	7.95394	8.0309	8.35418	8.2032	285.647	-0.518257	0.16191	-3.20089	0.00137005	0.00761792	processed_transcript	DTX2P1-UPK3BP1-PMS2P11
ENSG00000265688.1	5.28732	5.39733	5.93747	5.80543	52.5054	-1.34915	0.339472	-3.97427	7.05963e-05	0.00054101	antisense	MAFG-AS1
ENSG00000266869.1	9.32631	9.33577	9.67053	9.67825	737.688	-0.576493	0.0990402	-5.82079	5.85685e-09	8.14045e-08	lincRNA	RP6-114E22.1
ENSG00000267174.1	8.37876	8.45232	8.92297	9.02743	434.431	-0.971258	0.132884	-7.30906	2.69018e-13	5.57233e-12	3prime_overlapping_ncrna	CTC-510F12.4
ENSG00000267278.1	7.57922	7.49951	8.01068	8.02308	227.736	-0.87123	0.17397	-5.00792	5.50224e-07	5.96193e-06	antisense	MAP3K14-AS1
ENSG00000267311.1	3.5739	3.53431	4.20645	3.94797	16.4861	-2.39679	0.513947	-4.66349	3.10889e-06	3.02592e-05	lincRNA	RP11-99A1.2
ENSG00000267322.1	8.30145	8.39596	8.77184	8.76401	387.224	-0.730529	0.136763	-5.34159	9.21365e-08	1.10621e-06	antisense	SCARNA17
ENSG00000267520.2	6.41369	6.33957	6.72579	6.78922	97.6967	-0.801251	0.254593	-3.14718	0.00164851	0.00895163	3prime_overlapping_ncrna	RP11-373L24.1
ENSG00000268592.2	6.70341	6.7716	7.32124	7.3985	141.738	-1.23263	0.218947	-5.62983	1.8039e-08	2.36257e-07	antisense	RP11-244K5.8
ENSG00000269609.1	8.78935	8.90461	9.24449	9.19092	534.741	-0.631832	0.120828	-5.22918	1.70268e-07	1.97966e-06	processed_transcript	RP11-18I14.10
ENSG00000269966.1	9.10891	9.145	10.332	10.2811	1008.24	-1.98238	0.0927622	-21.3705	2.51293e-101	4.03108e-99	lincRNA	RP3-331H24.5
ENSG00000271850.1	7.97477	7.94983	8.37272	8.27904	289.025	-0.648645	0.15591	-4.16037	3.17734e-05	0.000260525	lincRNA	RP11-16D22.2
ENSG00000272384.1	6.16641	6.02984	6.76475	6.48728	87.9472	-1.14688	0.285984	-4.01029	6.06433e-05	0.000469128	lincRNA	RP11-44N11.2
ENSG00000272808.1	8.88345	8.88015	9.25988	9.28816	552.585	-0.66766	0.113582	-5.87821	4.14723e-09	5.88306e-08	lincRNA	RP11-66B24.7
ENSG00000272917.1	7.46348	7.49493	7.8875	7.85871	209.854	-0.729477	0.178596	-4.08451	4.41706e-05	0.000351897	processed_transcript	RP11-705C15.5
ENSG00000273162.1	7.21447	7.1706	7.7298	7.65787	181.585	-0.946225	0.193335	-4.89423	9.8693e-07	1.03368e-05	lincRNA	RP11-108L7.15
ENSG00000273289.1	4.50344	4.38526	4.89387	4.85625	27.1175	-1.39773	0.429811	-3.25197	0.00114608	0.00651348	antisense	RP6-109B7.5
ENSG00000273320.1	5.38826	5.50315	5.86638	5.92588	53.7498	-1.12948	0.331473	-3.40745	0.000655737	0.00398353	antisense	RP11-22N19.2

## Sheet: Common up
	RNAseq						GROseq
	baseMean	log2FoldChange	lfcSE	stat	pvalue	padj	baseMean	log2FoldChange	lfcSE	stat	pvalue	padj	transcript_type	transcript_name
ENSG00000006062.9	187.568	0.655491	0.166497	3.93694	8.25262e-05	0.000324857	875.595	1.94829	0.10373	18.7823	1.05323e-78	1.19525e-76	processed_transcript	MAP3K14
ENSG00000012171.13	344.911	1.41595	0.129993	10.8925	1.25216e-27	2.19411e-26	144.679	1.21409	0.220563	5.50451	3.70201e-08	4.66248e-07	processed_transcript	SEMA3B
ENSG00000170846.11	1287	0.490717	0.0660589	7.42848	1.0985e-13	1.00862e-12	605.9	0.884383	0.112655	7.85035	4.14878e-15	9.60023e-14	lincRNA	AC093323.3
ENSG00000177822.3	128.733	0.58968	0.195531	3.01578	0.00256316	0.00787788	216.314	0.653809	0.18726	3.49144	0.000480419	0.00302799	antisense	AC108142.1
ENSG00000196668.3	66.6448	1.56521	0.26713	5.85936	4.64652e-09	2.96744e-08	137.744	1.81115	0.234617	7.7196	1.16692e-14	2.62343e-13	processed_transcript	LINC00173
ENSG00000206113.3	79.107	2.53481	0.271712	9.32905	1.06825e-20	1.41403e-19	190.136	2.8042	0.440056	6.37237	1.86135e-10	3.02682e-09	lincRNA	RP11-503N18.1
ENSG00000214049.6	26.2038	1.22704	0.353983	3.46638	0.000527518	0.00183715	39.8496	2.25376	0.400047	5.63373	1.76354e-08	2.31396e-07	processed_transcript	UCA1
ENSG00000215417.6	84.3264	0.735876	0.234523	3.13775	0.00170247	0.00542443	392.806	0.720656	0.137944	5.22427	1.74841e-07	2.03061e-06	processed_transcript	MIR17HG
ENSG00000223749.3	84.6319	1.16966	0.234959	4.97816	6.4193e-07	3.3141e-06	432.279	1.94573	0.139529	13.9451	3.37197e-44	2.09741e-42	lincRNA	MIR503HG
ENSG00000225465.6	48.1323	3.69113	0.357044	10.338	4.74167e-25	7.51604e-24	527.749	3.95701	0.169804	23.3034	4.09676e-120	8.91881e-118	antisense	RFPL1S
ENSG00000227036.2	17.5088	1.60909	0.381665	4.21598	2.48693e-05	0.000105646	249.091	2.43682	0.189706	12.8452	9.14564e-38	4.84174e-36	lincRNA	LINC00511
ENSG00000230314.2	23.5889	1.15519	0.35565	3.24811	0.00116174	0.00382308	142.426	2.34466	0.240388	9.75366	1.77929e-22	5.80447e-21	antisense	ELOVL2-AS1
ENSG00000230978.1	6.51001	1.13185	0.384591	2.943	0.00325051	0.00982466	66.4014	3.25264	0.369808	8.79548	1.4244e-18	3.87128e-17	lincRNA	LINC00160
ENSG00000235123.1	8078.88	1.78083	0.0306719	58.0608	0	0	2337.51	0.536562	0.0680219	7.88807	3.06896e-15	7.18729e-14	antisense	DSCAM-AS1
ENSG00000236404.4	24.7885	1.08074	0.356348	3.03281	0.00242287	0.00747581	132.923	1.09681	0.23084	4.75137	2.02041e-06	2.02468e-05	antisense	RP11-125B21.2
ENSG00000240875.1	487.855	1.19271	0.107913	11.0525	2.13149e-28	3.89988e-27	2725.93	0.943362	0.0588088	16.0412	6.59035e-58	5.32595e-56	lincRNA	LINC00886
ENSG00000243069.3	80.1754	1.05708	0.244386	4.32543	1.52232e-05	6.64266e-05	947.225	0.965653	0.0917722	10.5223	6.81941e-26	2.55698e-24	processed_transcript	ARHGEF26-AS1
ENSG00000246174.3	57.3004	0.852547	0.27262	3.12724	0.00176457	0.00559782	546.418	2.46777	0.134146	18.3962	1.40817e-75	1.51734e-73	antisense	KCTD21-AS1
ENSG00000249346.2	124.637	2.78278	0.236588	11.7621	6.11758e-32	1.26368e-30	252.497	2.63561	0.192491	13.6921	1.1322e-42	6.78526e-41	lincRNA	LINC01016
ENSG00000249859.3	954.783	0.805802	0.0793709	10.1524	3.23462e-24	4.98131e-23	6155.01	0.576048	0.0440201	13.086	3.95819e-39	2.13792e-37	processed_transcript	PVT1
ENSG00000253125.1	137.411	3.41654	0.244294	13.9854	1.91497e-44	5.79445e-43	52.8149	2.28413	0.368423	6.19974	5.65571e-10	8.78198e-09	processed_transcript	RP11-459E5.1
ENSG00000253978.1	9.27536	1.37412	0.396099	3.46914	0.000522133	0.00181973	15.5414	2.59325	0.524455	4.94465	7.62823e-07	8.11308e-06	antisense	CTB-178M22.2
ENSG00000254290.1	25.6281	1.18977	0.352462	3.37559	0.000736589	0.00250269	81.3762	1.7061	0.295373	5.77608	7.64621e-09	1.05043e-07	lincRNA	RP11-150O12.3
ENSG00000254682.1	193.418	0.971104	0.164442	5.90545	3.51677e-09	2.27276e-08	247.081	0.834467	0.169114	4.93433	8.04247e-07	8.53238e-06	antisense	RP11-660L16.2
ENSG00000258603.1	6.86321	1.18937	0.38492	3.08992	0.00200209	0.00629021	193.87	4.03164	0.268496	15.0157	5.79776e-51	4.16482e-49	antisense	RP3-414A15.10
ENSG00000259459.1	24.9917	2.47371	0.374359	6.60786	3.8991e-11	2.95545e-10	481.538	3.11349	0.155347	20.0422	2.36019e-89	3.12761e-87	lincRNA	RP11-321G12.1
ENSG00000259977.1	6.56157	1.14052	0.384734	2.96444	0.00303231	0.00921368	225.262	3.68973	0.237377	15.5438	1.75365e-54	1.34583e-52	lincRNA	AL121578.2
ENSG00000260401.1	758.985	0.782028	0.0857239	9.12264	7.33176e-20	9.22166e-19	445.389	2.7488	0.15578	17.6454	1.10405e-69	1.07068e-67	sense_overlapping	RP11-800A3.4
ENSG00000261578.1	460.111	1.57926	0.117469	13.444	3.33692e-41	9.18551e-40	398.194	2.30228	0.1532	15.028	4.81498e-51	3.47053e-49	sense_overlapping	RP11-21L23.2
ENSG00000261606.1	7.85411	1.46885	0.390402	3.76241	0.000168287	0.000632102	51.0887	2.17533	0.372236	5.84396	5.09743e-09	7.169e-08	processed_transcript	RP11-414J4.2
ENSG00000261664.1	71.1475	0.969282	0.25012	3.87526	0.000106511	0.000411907	454.612	0.991347	0.127498	7.77537	7.5226e-15	1.69656e-13	antisense	RP11-275F13.1
ENSG00000268913.1	186.608	1.99108	0.182901	10.8861	1.34213e-27	2.34959e-26	309.938	3.10413	0.186074	16.6823	1.76445e-62	1.51183e-60	lincRNA	AC026806.2
ENSG00000272695.1	18.4132	1.80748	0.386754	4.67347	2.96152e-06	1.40912e-05	33.9021	3.68085	0.485028	7.58893	3.22551e-14	7.02924e-13	lincRNA	GAS6-AS2

## Sheet: Common down
	RNAseq						GROseq
	baseMean	log2FoldChange	lfcSE	stat	pvalue	padj	baseMean	log2FoldChange	lfcSE	stat	pvalue	padj	transcript_type	transcript_name
ENSG00000182310.8	107.352	-0.757395	0.215568	-3.51349	0.000442257	0.00155653	767.922	-1.0654	0.100145	-10.6386	1.96987e-26	7.58613e-25	processed_transcript	LINC00085
ENSG00000203635.2	159.788	-1.18123	0.186905	-6.31995	2.61641e-10	1.85618e-09	235.57	-0.697514	0.175984	-3.96351	7.38561e-05	0.000561955	lincRNA	AC144450.2
ENSG00000223808.1	320.23	-0.99334	0.131541	-7.55158	4.30009e-14	4.05639e-13	281.855	-0.815497	0.158372	-5.14926	2.61517e-07	2.95993e-06	lincRNA	RP11-428L9.2
ENSG00000225855.2	183.892	-0.756501	0.171797	-4.40345	1.06545e-05	4.7286e-05	282.549	-0.544559	0.156404	-3.48176	0.000498139	0.00313135	antisense	RUSC1-AS1
ENSG00000229989.3	149.089	-1.61455	0.196157	-8.23091	1.85794e-16	1.9962e-15	1098.12	-2.6277	0.0971839	-27.0385	5.21978e-161	1.61397e-158	lincRNA	MIR181A1HG
ENSG00000233237.2	134.14	-1.35952	0.315735	-4.3059	1.66308e-05	7.20869e-05	1059.43	-2.07388	0.0927886	-22.3506	1.19082e-110	2.17146e-108	lincRNA	LINC00472
ENSG00000233621.1	81.769	-1.40673	0.247726	-5.67857	1.35823e-08	8.26192e-08	180.366	-1.46604	0.196439	-7.46309	8.45158e-14	1.80134e-12	antisense	RP11-422J8.1
ENSG00000237126.4	33.4263	-1.32301	0.329986	-4.0093	6.08989e-05	0.000244706	106.523	-1.31867	0.249907	-5.27664	1.31573e-07	1.54918e-06	antisense	AC073254.1
ENSG00000244468.1	197.079	-0.781753	0.16512	-4.73447	2.19627e-06	1.05938e-05	768.363	-1.48989	0.100952	-14.7584	2.71561e-49	1.85697e-47	antisense	RP11-206M11.7
ENSG00000246985.3	102.827	-0.695215	0.215566	-3.22507	0.00125942	0.0041202	476.289	-0.933972	0.130413	-7.16164	7.97159e-13	1.59394e-11	processed_transcript	SOCS2-AS1
ENSG00000247011.2	72.8501	-1.73018	0.264224	-6.54815	5.82546e-11	4.3615e-10	531.182	-0.597135	0.121141	-4.92924	8.25501e-07	8.74047e-06	lincRNA	RP11-700H6.1
ENSG00000255571.2	269.298	-0.502483	0.144614	-3.47464	0.000511538	0.00178576	308.914	-0.848479	0.157431	-5.38953	7.06432e-08	8.62226e-07	lincRNA	LINC00925
ENSG00000260285.1	458.047	-0.590928	0.111662	-5.2921	1.20922e-07	6.74075e-07	205.099	-0.640602	0.180074	-3.55745	0.000374479	0.00243508	antisense	RP11-600F24.7
ENSG00000272808.1	52.3988	-1.23604	0.293457	-4.21199	2.53131e-05	0.000107435	552.585	-0.66766	0.113582	-5.87821	4.14723e-09	5.88306e-08	lincRNA	RP11-66B24.7
