# Supplementary material
Source: publisher figshare collection journal article supplement (https://tandf.figshare.com/articles/dataset/_/12851855)

**A**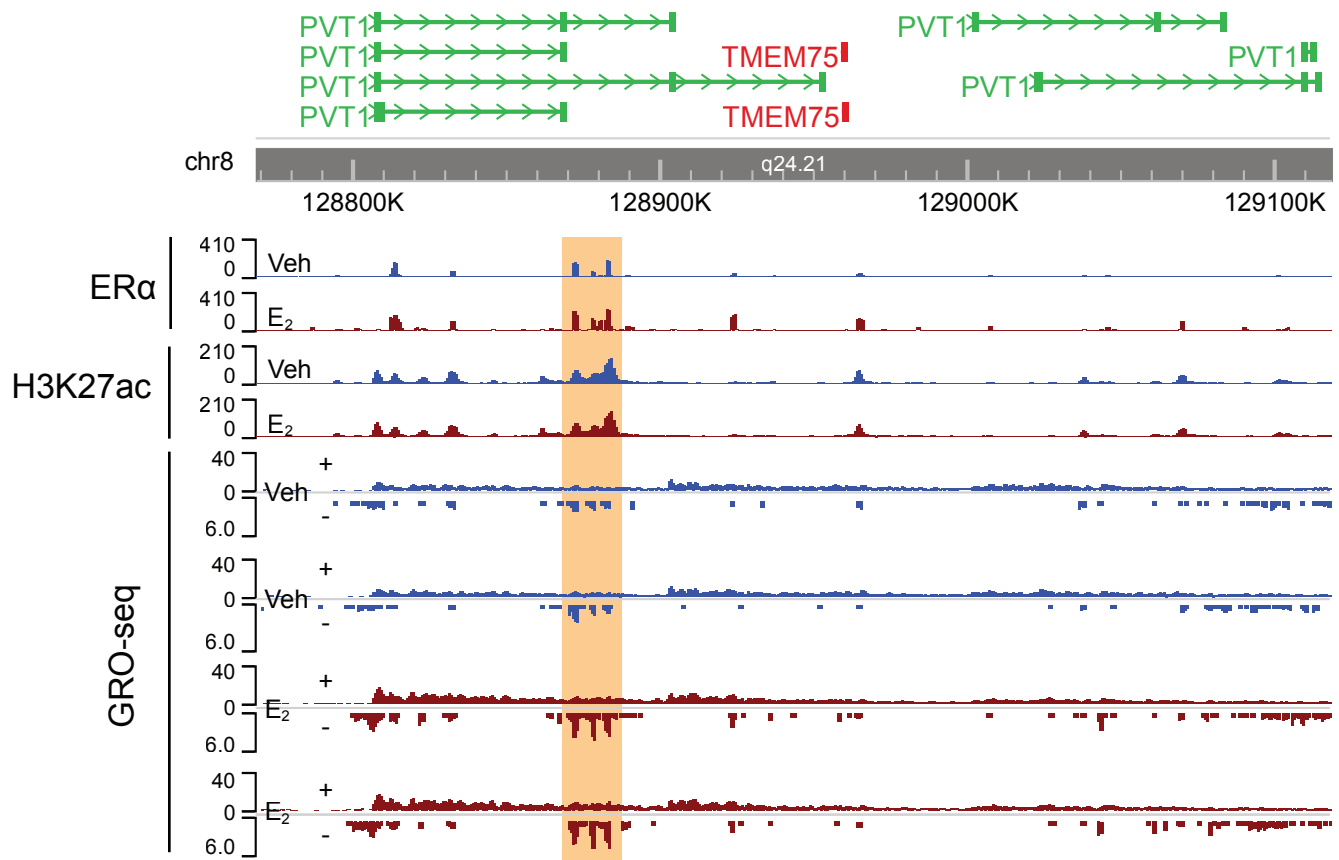**B**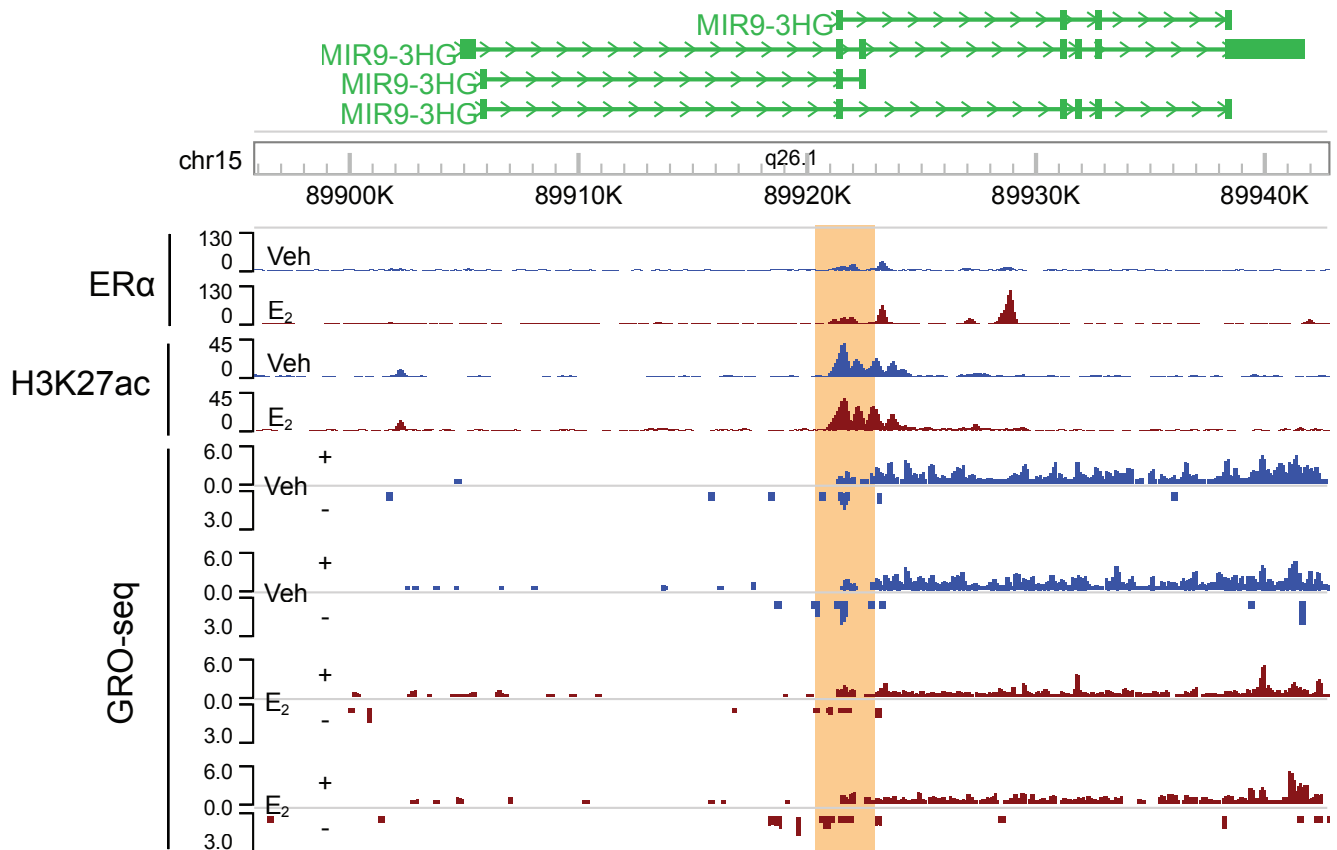

Figure S1 (Related to Figure 2)

Supplement: Supplementary file 1 [file 2]

**A**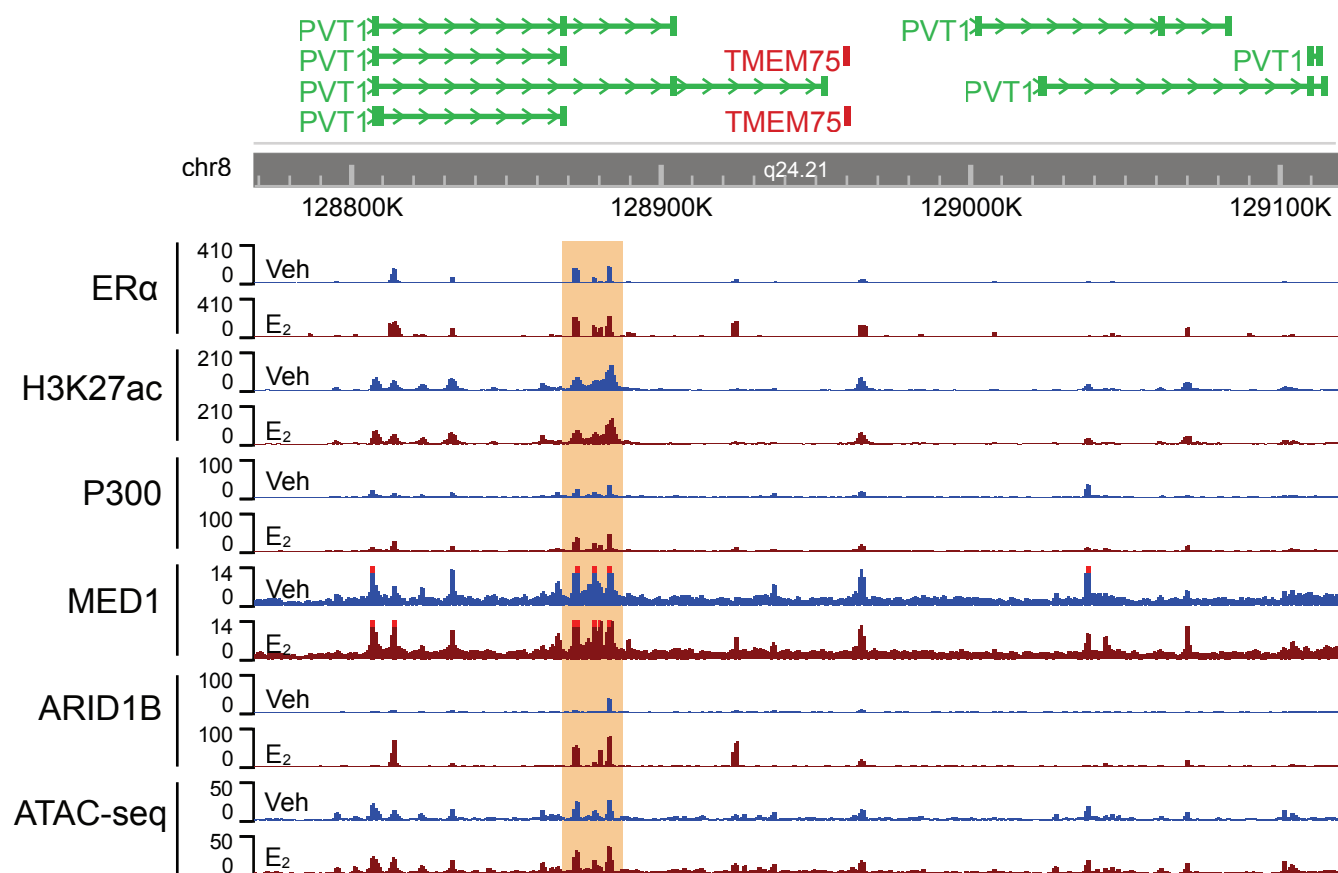**B**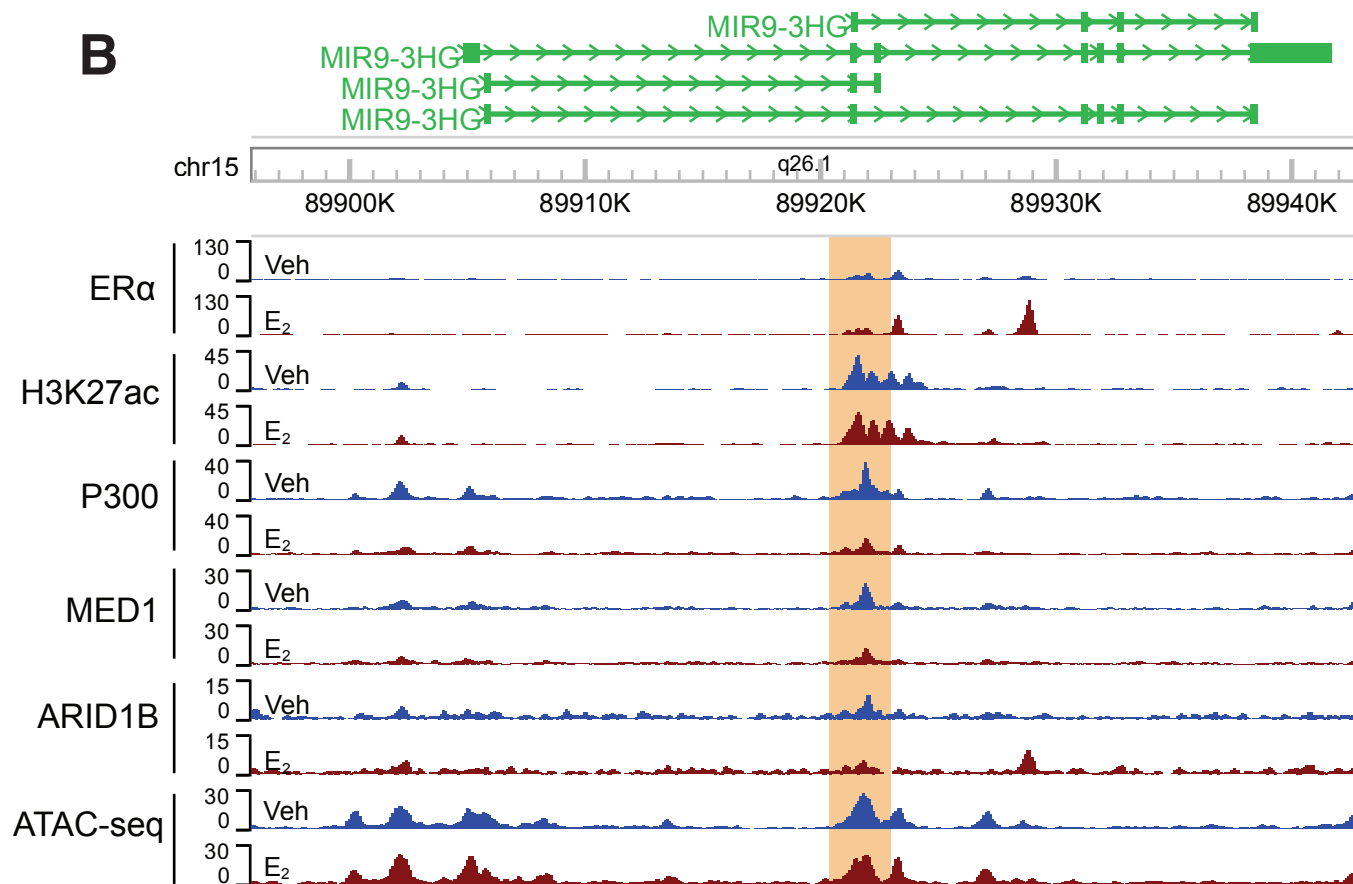

Figure S2 (Related to Figure 3)

Supplement: Supplementary file 2 [file 2]

**A****MCF7:**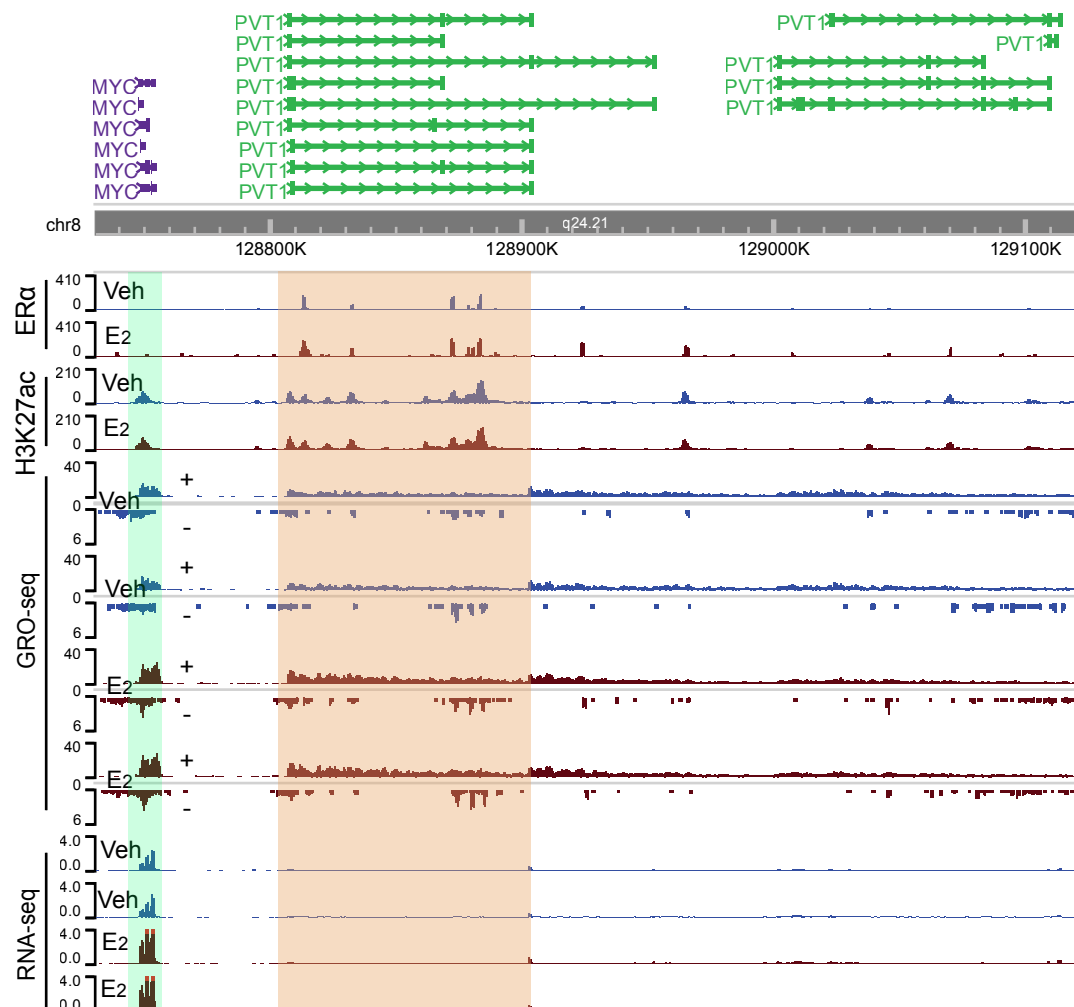**B****MCF7:**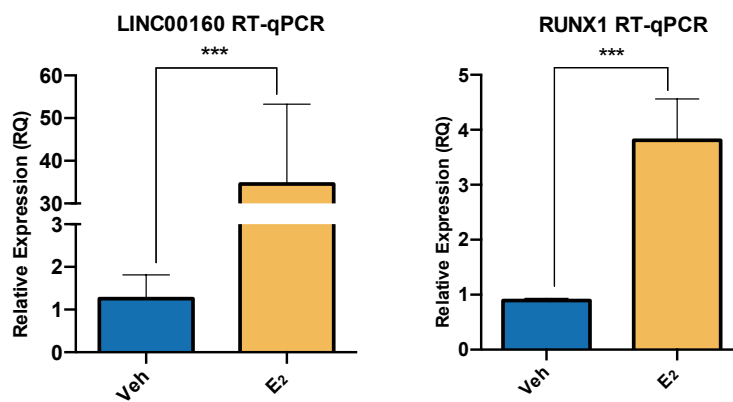**C****T47D:**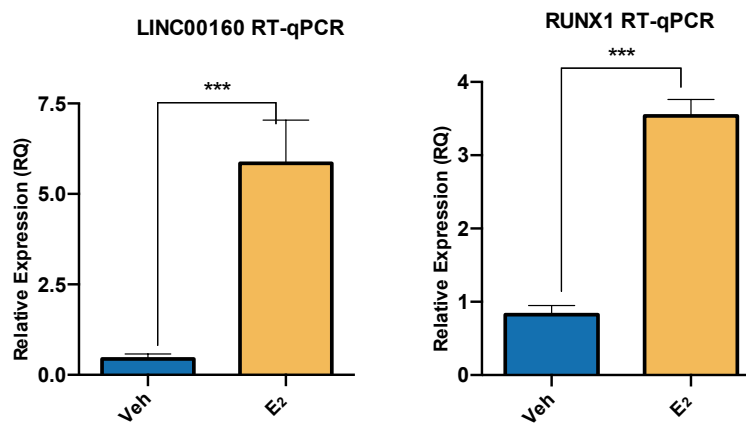**Figure S3 (Related Figure 4)**

Supplement: Supplementary file 3 [file 2]
